1

2 Genome-wide transcriptional responses of iron-starved  
3 *Chlamydia trachomatis* reveal prioritization of metabolic  
4 precursor synthesis over protein translation

5

6

7 Amanda J. Brinkworth<sup>1</sup>, Mark R. Wildung<sup>1,2</sup>, Rey A. Carabeo<sup>1#</sup>

8

9 1. School of Molecular Biosciences, College of Veterinary Medicine, Washington State  
10 University.

11 2. Laboratory of Biotechnology and Bioanalysis, College of Veterinary Medicine,  
12 Washington State University.

13 #. Corresponding Author

14

15 Running title: Global response of *C. trachomatis* to iron-starvation

16 Abstract word count: 250

17 Importance word count: 147

18 Text word count (Introduction, Results, Discussion): 5139

19 Text word count (Introduction, Results, Discussion, Materials and Methods,

20 Acknowledgements): 6058

21 ABSTRACT (exactly 250 words)

22 Iron is essential for growth and development of *Chlamydia*. Its long-term starvation in  
23 cultured mammalian cells leads to production of aberrant non-infectious chlamydial  
24 forms, also known as persistence. Immediate transcriptional responses to iron limitation  
25 have not been characterized, leaving a knowledge gap of how *Chlamydia* regulates its  
26 response to changes in iron availability. We used the fast-chelating agent 2,2'-Bipyridyl  
27 (BPDFL) to homogeneously starve *Chlamydia trachomatis* serovar L2 of iron, starting at  
28 6 or 12h post-infection. Immediate transcriptional responses were monitored after only 3  
29 or 6h of BPDFL-treatment, well before formation of aberrant *Chlamydia*. The first  
30 genome-wide transcriptional response of *C. trachomatis* to iron-starvation was  
31 subsequently determined utilizing RNA-sequencing. Only 7% and 8% of the genome  
32 was differentially expressed in response to iron-starvation at early and mid-stages of  
33 development, respectively. Biological pathway analysis revealed an overarching theme.  
34 Synthesis of macromolecular precursors (deoxynucleotides, amino acids, charged  
35 tRNAs, and acetyl-coA) was up-regulated, while energy-expensive processes (ABC  
36 transport and translation) were down-regulated. A large fraction of differentially down-  
37 regulated genes are involved in translation, including ribosome assembly, initiation and  
38 termination factors, which could be analogous to the translation down-regulation  
39 triggered by stress in other prokaryotes during stringent responses. Additionally,  
40 transcriptional up-regulation of DNA repair, oxidative stress, and tryptophan salvage  
41 genes reveals a possible coordination of responses to multiple antimicrobial and  
42 immunological insults. These responses of replicative-phase *Chlamydia* to iron-  
43 starvation indicate a prioritization of survival over replication, enabling the pathogen to

44 “stock the pantry” with ingredients needed for rapid growth once optimal iron levels are

45 restored.

46

47

48 IMPORTANCE (max 150 words, currently at 147)

49 By utilizing an experimental approach that monitors the immediate global response of  
50 *Chlamydia trachomatis* to iron-starvation, clues to long-standing questions in *Chlamydia*  
51 biology are revealed, including how *Chlamydia* adapts to this stress. We determined  
52 that this pathogen initiates a transcriptional program that prioritizes replenishment of  
53 nutrient stores over replication, possibly in preparation for rapid growth once optimal  
54 iron levels are restored. Transcription of genes for biosynthesis of metabolic precursors  
55 was generally up-regulated, while those involved in multiple steps of translation were  
56 down-regulated. We also observed an increase in transcription of genes involved in  
57 DNA repair and neutralizing oxidative stress, indicating that *Chlamydia* employs an “all-  
58 or-nothing” strategy. Its small genome limits its ability to tailor a specific response to a  
59 particular stress. Therefore, the “all-or-nothing” strategy may be the most efficient way  
60 of surviving within the host, where the pathogen likely encounters multiple simultaneous  
61 immunological and nutritional insults.

62

## 63 INTRODUCTION

64 The sexually transmitted bacterium *Chlamydia trachomatis* infects the mucosal  
65 epithelium of the endocervix, urethra, and anogenital tract. These infections usually  
66 resolve spontaneously, and most are asymptomatic and thus underreported. Over 1.5  
67 million cases of *C. trachomatis* genital infections were reported in the US in 2015 alone  
68 (1). As many as 17% of females infected with *C. trachomatis* develop long-term  
69 infections in the genital tract, which can result in serious complications such as pelvic  
70 inflammatory disease (PID), fallopian-tube scarring, and ectopic pregnancy, all of which  
71 are major risk factors for tubal factor infertility (TFI) (2). In some patients, infection  
72 persists even after antibiotic treatment (3, 4). The ability of *C. trachomatis* to survive  
73 long-term in some individuals despite host immunity and antibiotic treatment is not well  
74 understood, and may be associated with *Chlamydia's* ability to become persistent (5).  
75 While aberrant chlamydial forms have been identified in cervical samples, the clinical  
76 relevance of this phenomenon is not well understood (5, 6).

77 Chlamydiae are obligate intracellular Gram-negative bacteria that undergo a  
78 biphasic developmental cycle that includes both non-replicative and replicative forms  
79 (7). Infection begins when the small, metabolically quiescent chlamydial elementary  
80 body (EB) binds to mucosal epithelial cells and translocates virulence factors that  
81 induce its endocytic uptake. Within 2 hours of entry, the EB will differentiate into its  
82 replicative form, the reticulate body (RB). Continued secretion of effectors leads to  
83 modification of the endocytic vesicle such that it avoids fusion with the lysosome and  
84 enables capture of nutrient-rich vesicles. This unique intracellular niche, called the  
85 inclusion, continues to expand as RBs replicate. In response to unknown signals around

86 24h post-infection, RBs will then differentiate into infectious EBs, followed by EB release  
87 36-72 hours post-infection (7). Under exposure to certain stress conditions in cell culture  
88 (e.g. penicillin, interferon-gamma (IFN-g), iron-depletion or tryptophan-depletion) RBs  
89 will not differentiate into EBs, but instead enter into a state of persistence, characterized  
90 by aberrant, enlarged morphology (8–12). Persistent *Chlamydia* are resistant to both  
91 antibiotics and host immunity mechanisms, and can recover from this state upon  
92 removal of stress or addition of missing nutrients (13–16).

93 *Chlamydiae* have undergone reductive evolution as they have adapted to  
94 intracellular growth in mammalian cells, discarding metabolic genes responsible for  
95 synthesizing factors that could be acquired from the host (17). The core genome of *C.*  
96 *trachomatis* serovar L2 encodes only 889 open-reading frames, making *Chlamydia*  
97 dependent on its host for lipids, nucleotides, amino acids, and metal cofactors (17).  
98 Exposure of *Chlamydia*-infected cells to immune mediators, such as interferon-g,  
99 reduces the availability of these factors and results in reduced RB division and  
100 differentiation (11, 13). IFN-g induces intracellular depletion of tryptophan by increasing  
101 levels of indolamine 2,3-dioxygenase, which is responsible for catabolizing tryptophan  
102 into kynurenines, which cannot be utilized in tryptophan metabolism (18).

103 Induction of inflammatory cytokines such as interferon-g and IL-6 in response to  
104 chlamydial infection likely causes sequestration of free iron by the mononuclear  
105 phagocytic system, which includes both cellular and systemic regulatory pathways (19–  
106 26). Readers are referred to two comprehensive reviews of the coordinated regulation  
107 of iron homeostasis by systemic and cellular mechanisms (25, 27). In the context of

108 *Chlamydia* infection of the genital epithelium, iron availability in infected cells is likely  
109 limited by down-regulation of transferrin receptor and upregulation of the iron-storage  
110 factor, ferritin (28). Iron-levels in the female genital tract can also fluctuate throughout  
111 the menstrual cycle, in part due to hormone-induced expression of lactoferrin (29, 30).  
112 Iron is essential for growth and development of *Chlamydia*, and its acquisition and  
113 accumulation must be carefully regulated. In mammals, the readily usable ferrous iron  
114 ( $\text{Fe}^{2+}$ ) is tied up in molecular complexes, limiting their interaction with hydrogen peroxide  
115 to form damaging hydroxyl radicals through the Fenton reaction (31). Eukaryotic stores  
116 of ferric iron ( $\text{Fe}^{3+}$ ) are strictly regulated to restrict access by pathogenic bacteria  
117 (32). Extracellular bacteria such as *Pseudomonas* and *Yersinia* utilize multiple  
118 redundant iron-binding molecules called siderophores that compete with mammalian  
119 transferrin for ferrous iron (33, 34). Intracellular bacteria, such as *Mycobacterium*,  
120 *Francisella* and *Chlamydia*, can obtain iron by subverting host vesicles that contain  
121 holo-transferrin bound to transferrin receptor (35–38). Using a combination of endocytic  
122 markers and chemical inhibitors, our laboratory discovered that *Chlamydia* specifically  
123 recruits transferrin-containing vesicles from the slow-recycling endocytic pathway (37).  
124 Once delivered into the inclusion, iron is likely imported into bacteria through an ABC  
125 transporter system, encoded by *ytgABCD*, which is the only known iron acquisition  
126 system in *Chlamydia* species (39–41). The C-terminus of the YtgC permease, referred  
127 to as YtgR, is homologous to the *Cornyebacterium* repressor DtxR, and has been  
128 recently characterized as an iron-dependent repressor of the *ytgABCD* iron-acquisition  
129 operon (41). A recent review highlights the differences between iron-acquisition  
130 strategies of *Chlamydia* with other intracellular bacteria (26).

131 Conversion to the aberrant phenotype in response to iron-starvation reduces the  
132 infectious potential of *Chlamydia*, since only a portion of RBs recover from stress and  
133 complete development into infectious EBs once iron is added back into the media (42).  
134 Previous studies have characterized aberrant *C. trachomatis* after long-term treatment  
135 with the iron-chelator deferoxamine, and have detected increased expression of the  
136 iron-binding protein YtgA, indicating its role in iron-uptake (40, 43, 44). However, these  
137 studies added deferoxamine at the time of infection, and did not monitor transcriptional  
138 or proteomic patterns until  $\geq 24$  hours post-infection, making it difficult to determine if this  
139 up-regulation is part of the initial response to iron starvation. Immediate genome-wide  
140 transcriptional responses to iron limitation have not yet been characterized in detail,  
141 leaving a gap in the current knowledge of how *Chlamydia* regulates its response to  
142 changes in iron availability.

143 This study provides the first global profile of the *C. trachomatis* transcriptional  
144 response to iron starvation. Our short-term, effective treatment regimen in combination  
145 with deep RNA-sequencing reveals the immediate response of *Chlamydia* to iron-  
146 starvation in the logarithmic phase of growth when the bacteria are in the RB form. Here  
147 we utilize this dataset to map the specific biological pathways altered in response to  
148 iron-starvation. Taken together our results provide important clues to how *Chlamydia*  
149 survives iron limitation. Accumulation of metabolite precursors is prioritized over  
150 macromolecular biosynthesis. In addition, the transcriptional induction of genes involved  
151 in adaptation to other stress, e.g. oxidative stress and amino acid starvation, points to  
152 the inability of *Chlamydia* to tailor its transcriptional response to a specific stress. Lastly,



153 the global transcriptomic profile of iron-starved *Chlamydia* provided valuable insights  
154 into how the biphasic developmental cycle might irreversibly switch to persistence.

155

## 156 RESULTS

### 157 **Treatment optimization to detect the immediate chlamydial response to iron-** 158 **starvation**

159 The bivalent chelator 2,2-Bipyridyl (BPD) has been shown to deplete both ferrous  
160 and ferric iron from *Chlamydia*-infected cells during long-term treatment, and it induces  
161 the development of aberrant forms more consistently and homogeneously than the  
162 previously used ferric iron chelator, deferoxamine (42). Here, we determined the optimal  
163 duration of BPD treatment to induce iron-responsive transcription without inducing  
164 morphological abnormalities in *Chlamydia*. We chose to begin starvation during mid-  
165 cycle development (12h p.i.) instead of at the beginning of infection for two reasons: 1)  
166 to test the response of actively replicating *Chlamydia* that are able to maximally respond  
167 to stress, and 2) to ensure that both treated and mock-treated *Chlamydia* remain in the  
168 same stage of development (RB). We monitored chlamydial morphology, growth, and  
169 transcriptional responses after 3, 6, and 12h of BPD treatment (Figure 1A). Indirect  
170 immunofluorescent confocal microscopy revealed similar morphology between mock-  
171 treated and BPD-treated forms for up to 12h of BPD-treatment (Figure 1B).  
172 Interestingly, observation of BPD-treated cultures by light microscopy revealed an  
173 obvious decrease in Brownian movement within inclusions after 6 or more hours of  
174 treatment (data not shown). This observation is consistent with our findings that

175 chlamydial growth is reduced compared to mock-treated after only 6h of BPD-  
176 treatment, as determined by quantitative PCR of chlamydial genomes (Figure 1C).

177  
178 We monitored the transcriptional response of the known iron-responsive genes *ytgA*  
179 and *ahpC* by reverse transcriptase quantitative polymerase chain reaction (RT-qPCR)  
180 to validate the iron starvation protocol (39, 40, 42, 45). Elevated transcription of both  
181 iron-starvation markers was detected after only 6h BPD-treatment, compared to mock-  
182 treated (1.5-fold and 1.7-fold). Maximum differences in transcription of both markers  
183 were detected after 12h of BPD treatment (2.8-fold and 3.7-fold; Figure 1D). In the  
184 same experiment, we also monitored the transcriptional profile of the early gene, *euo*,  
185 which decreases during late stages of normal development. Multiple persistence  
186 models have demonstrated dysregulated of *euo* transcription, with high levels of *euo*  
187 mRNA detected late in development under persistence-inducing conditions (14, 42, 44).  
188 After 12h BPD treatment, we observed that *euo* transcript levels remained elevated  
189 relative to the mock-treated control, indicating dysregulated transcription or a possible  
190 delay in development (Figure 1E, top). This delay in development during longer BPD-  
191 treatment is supported by the lack of recoverable inclusion-forming units (IFUs)  
192 detected after 12 or 24h BPD-treatment compared to mock-treated controls (Figure  
193 1F), indicating a possible lack of RB-to-EB differentiation. Because 6h BPD-treatment  
194 is sufficient to induce iron-responsive transcription without inducing the morphology and  
195 transcriptional pattern associated with persistence, we chose it as the optimal duration  
196 of iron-starvation for our genome-wide transcriptional studies. We also included 3h

197 BPDFL-treatment to detect the earliest possible response to iron-starvation prior to  
198 BPDFL-induced changes in growth.

199

200 **Global transcriptional response of *C. trachomatis* to iron-starvation during mid-**  
201 **cycle development**

202 The primary global response of *C. trachomatis* to mid-cycle iron starvation was  
203 determined by RNA-sequencing (RNA-seq). We utilized an Ion Proton for sequencing,  
204 which allowed for easy and rapid scaling of timepoints based on observed yield of  
205 mapped reads. This approach is relevant to the study of *Chlamydia* transcription  
206 because chlamydial mRNA represents a small proportion of the total RNA at the time  
207 points analyzed, even after significant enrichment steps. For mid-cycle iron starvation  
208 studies, we aimed for greater than 10x coverage of 100% of the *C. trachomatis*  
209 genome, with a minimum of 3 biological replicates per sample. The sequencing reads  
210 were trimmed to exclude adaptor sequences and polyclonal reads, followed by  
211 exclusion of reads less than 30 nucleotides in length. The remaining reads were aligned  
212 to the *C. trachomatis* genome and plasmid, with 2 to 23% of trimmed reads mapping.  
213 Average read lengths varied from 92 to 134 nucleotides, requiring an average of  
214 108,837 mapped reads to reach our coverage goal. A summary of the read and  
215 mapping statistics for all of our samples can be found in Table 1. Alignments,  
216 comparisons, and normalization of aligned reads were done with CLC Genomics  
217 Workbench version 9.0 according to default settings. All mid-cycle conditions (12h  
218 untreated, 12+3h BPDFL, 12+3h mock, 12h+6h BPDFL, 12+6h mock) were compared  
219 using the CLC Genomics experiment tool, normalized by quantile scaling and analyzed

220 for differential gene expression using EdgeR statistical analysis with false-discovery rate  
221 (FDR) calculation. Because we included ribosomal rRNA, eukaryotic mRNA, and small  
222 RNA (<100 nt) depletion steps when preparing chlamydial mRNA for RNA-seq, we also  
223 excluded tRNAs, rRNAs, and genes with < 10 mean reads in a sample group prior to  
224 normalization and analysis.

225

226 The genome-wide profile of mock-treated and BPDFL-treated gene expression during  
227 mid-cycle development (12h to 18h post-infection) is displayed as a heatmap of  
228 normalized expression values (Figure 2A). Mock-treated (left) and BPDFL-treated (right)  
229 profiles are remarkably similar across all genes that significantly change during normal  
230 mid-cycle development of *Chlamydia* (based on comparisons 12h vs 15h, 15h vs 18h,  
231 or 12h vs 18h, p-value  $\leq 0.01$ ). The annotated expression heatmap and EdgeR  
232 comparisons for normal growth can be found in Supplemental Figure 1 and  
233 Supplemental Table 1, respectively. The entire RNA-seq dataset of normal development  
234 can be found in Supplemental Table 2. The similarity between global expression profiles  
235 indicates that *Chlamydia*'s normal development is not dysregulated after only 3h or 6h  
236 of BPDFL-treatment. However, EdgeR analysis of BPDFL-treated cultures compared to  
237 mock-treated samples (at equivalent time points post-infection) revealed 8% (76/889) of  
238 the genome was differentially expressed after 3h BPDFL-treatment and 1% (12/889) was  
239 differentially expressed after 6h BPDFL-treatment. Genes that were differentially  
240 expressed with a maximum p-value of 0.01 are displayed in a heatmap of fold-change  
241 differences between BPDFL-treated and mock-treated samples (Figure 2B). Examples of  
242 decreased transcription after 3h and 6h BPDFL-treatment include the ribosomal subunit

243 genes *rpsO* and *rpsT*, and the type III secretion genes *copB* and *scc2*, respectively.  
244 Transcription of the tryptophan salvage pathway operon, *trpBA*, and the ribonucleotide  
245 reductase operon, *nrdAB*, was significantly increased after both 3 and 6h of treatment.  
246 Iron-responsive genes that were differentially expressed with a p-value  $\leq 0.01$  after 3 or  
247 6h of BPD-L-treatment are listed in Table 2 and Table 3, respectively. The fully  
248 annotated heatmap can be found in Supplemental Figure 2, and the full set of RNA-  
249 sequencing results for mid-cycle iron starvation can be found in Supplemental Table 3.

250

251 **Functional categorization of differentially expressed genes during mid-cycle**  
252 **response to iron-starvation.**

253 Annotations and functional categories of differentially expressed genes during mid-  
254 cycle iron-starvation were retrieved from UniProt and are listed in Table 2 and Table 3.  
255 Genes differentially expressed, with a minimum p-value of 0.01, after only 3h of BPD-L-  
256 treatment are grouped by functional category of induced and reduced transcripts (Table  
257 2, Figure 3) (46). Of the 39 genes significantly induced after only 3h iron-starvation,  
258 representing 4% of the genome, five categories were equally represented with 3 genes  
259 each: energy metabolism (*glgA*, *lpdA*, *glmS*), amino acid biosynthesis (*trpA*, *trpB*, *aroL*),  
260 DNA replication and repair (*nrdA*, *recA*, *dnaQ*), type III secretion (*mcsC*, *ctl0085*,  
261 *ctl0043*), and translation (*pheT*, *cysS*, *thrS*). Of the 37 genes that were significantly  
262 reduced in response to 3h BPD-L-treatment, representing 4% of the genome, the  
263 majority of these (39%) are associated with translation (*prfA*, *rplW*, *rsfS*, *smpB*, *ctl0132*,  
264 *rpsK*, *rplT*, *rplN*, *ctl0680*, *rpml*, *rmpJ*, *infA2*, *rpsT*, *rpsO*), and 11% are associated with  
265 nutrient transport (*ctl0061*, *ctl0485*, *gltT*, and *ytgD*). Transcript levels of only 5 genes

266 were significantly increased after 6h BPDFL-treatment (*trpB*, *trpA*, *nrdA*, *ctl0071*, and  
267 *nrdB*) while transcript levels of 7 genes were decreased (*ctl0185*, *ctl0619*, *tsp*, and the  
268 entire *scc2-ctl0840-cobB-copD* operon) (Table 3).

269

270 To independently confirm the mid-cycle response detected by RNA-sequencing, we  
271 utilized RT-qPCR. Increased transcription in response to iron-starvation was confirmed  
272 for all of the transcripts tested by RT-qPCR, with the exception of *recA* (Figure 4A).  
273 None of the tested down-regulated genes were significantly reduced compared to  
274 controls by RT-qPCR, likely due to the fact that the genes tested were very low in  
275 abundance at the timepoints tested (Figure 4B).

276

277 **Functional categorization of differentially expressed genes during early-cycle**  
278 **response to iron-starvation.**

279 *Chlamydia* infections of the genital tract are asynchronous. Thus *Chlamydia* could  
280 be exposed to host-induced stress at any point in the developmental cycle. For this  
281 reason, we extended our analysis of the immediate response to iron starvation to an  
282 earlier point in the developmental cycle. *Chlamydia*-infected cells were treated with  
283 BPDFL starting at 6h post-infection, which is after the initial EB-to-RB differentiation and  
284 at the beginning of the logarithmic growth phase. RNA and genomic DNA were  
285 collected at 9h post-infection for both treated and mock-treated samples. RNA-seq and  
286 alignments were performed as described above. A summary of mapped reads and  
287 coverage can be found in Table 1.

288

289 Genes differentially expressed during the early cycle response (6+3h BPDFL vs 6+3h  
290 mock-treated), with a maximum p-value of 0.01, are grouped by functional categories of  
291 induced and reduced transcripts (Figure 5). The full set of differentially expressed genes  
292 and their annotations can be found in Table 4. Similar to results of the mid-cycle  
293 response, transcription of 4% of the genome was induced, including genes involved in  
294 DNA replication and repair (*nrdA*, *nrdB*, *mutS*, *dnaQ*, and *recA*), amino acid  
295 biosynthesis (*trpB*, *trpA*, *aspC\_1*, and *glyA*), and translation (*ctl0111*, *trpS*, *thrS*, and  
296 *aspS*) during the early-cycle response to iron starvation. Uniquely, genes involved in  
297 redox homeostasis (*pdi*, *ahpC* and *sodM*) were also up-regulated in response to iron-  
298 starvation starting at 6h post-infection but not during the mid-cycle response. Of the 23  
299 genes with reduced transcription during the early-cycle response to iron-starvation (3%  
300 of the genome), 17% are associated with translation (*rplW*, *prfA*, *rplC*, *ftsY*), and 13%  
301 with DNA replication and repair (*pGP8D*, *amn*, and *dnaX\_1*).

302  
303 Up-regulation of *trpA* transcription during early-cycle iron-starvation was confirmed  
304 by RT-qPCR, while only modest increases were observed for the other up-regulated  
305 genes tested (Figure 6A). Down-regulation of *ctl0430*, *ctl0063*, and *incD* during iron-  
306 starvation could not be confirmed by RT-qPCR (Figure 6B). We reasoned that early-  
307 cycle responses were not detected by RT-qPCR for most of our tested genes due to the  
308 limit of detection of the technique. The raw values detected for most of our early-cycle  
309 transcripts fell at or below the lowest concentrations of our standard curves. Between 6  
310 and 9h post-infection, chlamydial mRNA represents a very small proportion of the total  
311 RNA. This limitation was overcome for RNA-seq experiments by depleting rRNAs and

312 eukaryotic RNA prior to synthesizing cDNA. However, cDNA used in RT-qPCR was  
313 prepared from total RNA. The overwhelming proportion of eukaryotic RNA present in  
314 the undiluted cDNA used as template may have impeded accurate detection of  
315 transcripts.

316

### 317 **Network and biological pathway analysis**

318 To further analyze the relevance of these gene expression changes to chlamydial  
319 survival, we utilized the bioinformatics tool STRING-db v.10.5 to generate networks of  
320 functionally associated genes (47). Representation of differentially expressed gene sets  
321 ( $p$ -value  $\leq 0.05$ ) from short-term iron starvation (3h) reveals gene networks with  
322 intersecting pathway clusters (manually added grey circles). Consistent with our  
323 predicted functional categories, network analysis of both early (Figure 7A) and mid-  
324 cycle (Figure 7B) responses to iron-starvation revealed clusters that include amino acid  
325 biosynthesis, DNA replication and repair, and translation. Functional clustering of the  
326 mid-cycle response also revealed the entire cluster of genes necessary to convert  
327 pyruvate to acetyl-CoA, as well as gene clusters involved in tRNA modification and  
328 charging.

329

330 The locus identifiers of genes in each identified cluster were submitted to  
331 KEGGMapper v2.8 to determine possible roles in specific biological pathways (48). For  
332 example, genes from the early-cycle DNA replication and repair cluster (Figure 7A)  
333 were mapped to multiple pathways including purine metabolism (5), pyrimidine



334 metabolism (5), mismatch repair (5), replication (4), homologous recombination (3),  
335 double-stranded breaks repair (2), and base excision repair (1).

336

### 337 *Nucleotide metabolism*

338 We modified the KEGGMapper output for pyrimidine metabolism to indicate the  
339 direction of change in mid-cycle gene expression during iron starvation (Figure 7C).

340 Under all iron-starvation conditions, the ribonucleotide reductase genes *nrdA* and *nrdB*  
341 were up-regulated. Ribonucleotide diphosphates (NDPs) bound to NrdA are converted  
342 by NrdB to deoxynucleotide diphosphates (dNDPs). These dNDPs are not likely further  
343 converted to dNTPs, as indicated by the down-regulation of nucleotide diphosphate  
344 kinase, *ndk*. Expression of thymidylate synthase gene, *thyX*, which converts dUMP to  
345 dTMP, was also up-regulated during iron starvation. Available dUMP would likely be  
346 derived from the UDP pool, instead of from the dUTP pool, since transcription of the  
347 dUTP pyrophosphatase gene, *dut*, is down-regulated during iron-starvation. Taken  
348 together, these transcriptional changes would result in a net increase in dNDPs,  
349 enabling rapid DNA replication when iron levels and *ndk* expression return to normal  
350 (Figure 7C).

351

### 352 *Amino acid biosynthesis*

353 Functional clustering also indicates that *Chlamydia* prioritizes maintenance of amino  
354 acid pools during iron starvation. Multiple amino acid synthesis, inter-conversion, and  
355 uptake mechanisms were up-regulated in response to short-term iron-starvation.  
356 Transcriptional up-regulation of the branched chain amino acid transporter, *brnQ*, the

357 aspartate aminotransferase, *aspC*, and the serine hydroxymethyltransferase, *glyA* may  
358 increase the diversity of the amino acid pool such that *Chlamydia* can quickly adapt to  
359 fluctuations in amino acids. Surprisingly, the tryptophan salvage pathway genes, *trpB*  
360 and *trpA*, were consistently up-regulated during short-term iron-starvation. The  
361 tryptophan synthase subunit TrpB catalyzes the beta-replacement of indole with serine  
362 to form tryptophan (Trp), while TrpA facilitates the interaction of TrpB with indole (49).  
363 Their role in recovery from IFN-g and Trp-starvation stresses is well documented, but  
364 differential regulation in response to iron-starvation is novel (50, 51). While the  
365 biological relevance of *trpBA* induction during iron-starvation is unclear, we reason that  
366 *Chlamydia* could in fact prepare for further immune insult (e.g. IFN-g induction of  
367 indoleamine 2,3-dioxygenase expression) by increasing intracellular Trp levels. Taken  
368 together, iron-starvation may increase levels of serine, aspartate, glutamate, branched-  
369 chain amino acids, and tryptophan, many of which are essential for normal development  
370 (52–56). Amino acid biosynthetic genes were significantly overrepresented (4.38-fold, p-  
371 value=0.0464) in the set of differentially expressed mid-cycle genes as determined by  
372 the Panther Overexpression Test (57).

373

#### 374 *Translation*

375 The largest cluster generated from STRING-db included translation factors of the  
376 mid-cycle response (Figure 7B). Based on protein annotations in Uniprot and Biocyc  
377 databases, it is evident that *C. trachomatis* responds to iron-starvation by shutting down  
378 factors involved in every step of translation: ribosome assembly, initiation, elongation,  
379 termination, ribosome recycling, and peptide targeting (46, 54; Table 4). While

380 preventing the assembly and function of translational machinery, *Chlamydia* also  
381 responds to iron starvation by increasing factors important for synthesis and  
382 modification of tRNAs, in addition to increasing transcription of *rnC*, the product of which  
383 cleaves rRNA transcripts into ribosomal subunit precursors (Table 4). Collectively, these  
384 findings indicate that *Chlamydia* responds to iron starvation by shutting down production  
385 of new proteins, effectively preventing progression of the developmental cycle.  
386 However, *Chlamydia* likely prioritizes maintenance of an amino-acyl-tRNA pool and  
387 ribosomal precursors such that translation can rapidly resume under better  
388 environmental conditions. Translation genes were significantly overrepresented (3.26-  
389 fold, p-value=0.0243) in the set of mid-cycle differentially expressed genes as  
390 determined by the Panther Overexpression Test (57).

391

#### 392 *Acetyl-coA synthesis*

393 Transcription of the entire set of genes necessary for conversion of pyruvate to  
394 acetyl-CoA was induced during the mid-cycle response to BPDFL-treatment (Figure 7D).  
395 This includes the lipoylation enzymes *lipA* and *lpdA*, and the entire pyruvate  
396 dehydrogenase complex, *pdhABC*. In addition, transcription of the TCA cycle gene  
397 *mdhC* and glycolysis gene *eno* was induced, likely driving formation of pyruvate from  
398 different carbon sources. Acetyl-CoA can be converted to malonyl-CoA for fatty-acid  
399 biosynthesis or utilized in the formation of N-acetylglucosamine-1-phosphate for  
400 peptidoglycan synthesis, both of which are required for rapid growth of *Chlamydia* (59,  
401 60). Since transcription of the peptidoglycan-modifying enzymes, *glmS* and *murB*, were  
402 also increased during iron starvation, acetyl-coA is likely used to form new

403 peptidoglycan. Expression of fatty acid synthesis genes was unchanged during iron-  
404 starvation.

405

## 406 DISCUSSION

407 We monitored the immediate global transcriptional response of *Chlamydia*  
408 *trachomatis* serovar L2 to short-term iron-starvation during early and mid-cycle (RB  
409 phase) development. In contrast to previous studies of iron starvation in *Chlamydia*, our  
410 short-term treatment with BPDFL did not cause the hallmark changes in morphology and  
411 *euo* transcription associated with persistence. This approach enabled us to detect a  
412 response specific to iron starvation as *Chlamydia* tries to adapt to stress, rather than the  
413 transcriptome of the aberrant bacterium. By deep RNA-sequencing we were able to  
414 identify novel primary transcriptional responses, representing 7-8% of the genome, after  
415 only 3h of iron-starvation with BPDFL. It is possible that a more immediate response  
416 could be detected with even shorter BPDFL treatments, though we expect a longer  
417 duration is required to chelate both free iron and iron bound to protein complexes in  
418 intracellular *Chlamydia*. Since only 12 genes were differentially expressed after 6h  
419 BPDFL-treatment, a longer duration of treatment may be necessary to detect the full  
420 secondary response, which may not be obvious until the effects of the primary  
421 transcriptional response are realized at the protein level. This is supported by the fact  
422 that 6h BPDFL-treatment maintains induction of the primary response operons, *trpBA*  
423 and *nrdAB*, while reducing or delaying expression of some late cycle genes (*scc2-*  
424 *ctl0840-copB-copD*, *tsp*). Decreased or delayed late gene expression has also been  
425 observed during long-term iron-starvation (42, 45, 61, 62).

426

427       In agreement with proteomic observations of deferoxamine-treated *C. trachomatis*  
428 after 24h and *C. pneumoniae* after 48h post-infection, we observed up-regulation of  
429 *ctl0874/cadd*, *ahpC*, *eno*, and *htrA* during short-term BPDL-treatment (44, 63). In  
430 contrast to previous iron-starvation studies, we did not detect a significant increase in  
431 *ytgA* expression in our RNA-seq results. We expected the *ytgABCD* iron acquisition  
432 operon to be immediately induced in response to iron-starvation, since its repression by  
433 YtgR is dependent on available iron (41). Expression of the *ytgABCD* operon peaks  
434 during mid-cycle development, indicating that the iron-dependent repressor, YtgR, may  
435 be inactive or at low levels during early and mid-cycle (14, 41). It is possible that we do  
436 not observe significant differences in the expression of the operon during iron-starvation  
437 because it is already maximally expressed in the mock-treated controls (Table S2).  
438 Global detection of YtgR repression by CHIP-sequencing or targeted analysis of specific  
439 promoters will be necessary to delineate the contribution of YtgR activity to the detected  
440 iron-responsive regulon. Additionally, other unidentified iron-uptake and iron-dependent  
441 repression mechanisms may exist, and thus could be represented in our set of iron-  
442 starvation induced genes.

443       Consistent transcriptional induction of the ribonucleotide reductase genes, *nrdA* and  
444 *nrdB*, under short-term iron starvation, indicates that deoxynucleotides may be  
445 important to survive this stress. However, since NrdB requires iron for its function,  
446 deoxynucleotide levels may not increase until iron becomes available. Instead, high  
447 levels of inactive NrdA-B complexes may actually impede replication and development

448 by inducing stalling at replication forks, providing a possible explanation for the  
449 decreased replication observed during iron-starvation (77, 79).

450  
451 *Chlamydia*'s immediate transcriptional response to iron-starvation is remarkably  
452 similar to stringent responses in other bacteria, which enable rapid adaptation to various  
453 stresses by diverting resources from macromolecular biosynthesis, e.g. translation, and  
454 growth to immediate survival, often resulting in a quiescent state (64, 65). This rapid  
455 transcriptional response is achieved through synthesis of the chemical alarmone,  
456 (p)ppGpp, which interacts with RNA polymerase and DksA to globally modify  
457 transcriptional activity (66, 67). During amino acid starvation in bacteria, uncharged  
458 tRNAs in the A-site of ribosomes are sensed by RelA, which responds by synthesizing  
459 (p)ppGpp from ATP and GDP or GTP (68, 69). (p)ppGpp can also be synthesized and  
460 hydrolyzed by SpoT during other stress conditions. However, since *Chlamydia* lacks the  
461 RelA and SpoT homologues necessary for (p)ppGpp synthesis, they likely evolved  
462 alternative mechanisms to reduce growth and increase survival responses during stress  
463 (16, 70, 71). It is hypothesized that IFN-gamma induced depletion of tryptophan leads  
464 to ribosome stalling at tryptophan codons, and differences in tryptophan codon content  
465 may directly regulate translation efficiency and mRNA stability (16, 71–73). *Chlamydia*  
466 may have adapted the tryptophan-content of open-reading frames (ORFs) to guide the  
467 stress response during tryptophan-depletion. Trp-poor ORFs which may be important  
468 for immediate survival of stress, such as menaquinone biosynthesis enzymes, would be  
469 translated more efficiently during tryptophan-depleted conditions than Trp-rich ORFs,

470 such as nutrient transporters, which are more important for supporting rapid growth  
471 during improved conditions (73).

472

473 Pathway analysis clearly indicates that transcripts involved in all steps of translation  
474 from initiation to ribosome recycling are down-regulated during iron-starvation. This  
475 reduction in translation factors may lead to an eventual shutdown or modification of  
476 translation activity that could increase survival during stress. By shutting down energy  
477 expensive protein synthesis, ATP and GTP pools can be rerouted to immediate survival  
478 responses (tRNA-charging, transcription). Similarly, iron-starvation reduces the  
479 transcription of several ABC transporter genes, which require ATP for their function.

480 Uncoupled RNA and protein levels in *Chlamydia* have also been observed during IFN-g  
481 stress (16). The apparent decrease in translation during IFN-gamma exposure could be  
482 exacerbated by decreases in the levels of components of the translation machinery in  
483 response to simultaneous iron-starvation. However, decreased expression of translation  
484 factors during the primary response to iron-starvation may not be apparent until pre-  
485 existing ribosomal-protein complexes are degraded or destabilized. This may explain  
486 why  $\geq 24$ h of iron-starvation is required to induce the development of aberrant RBs (42).  
487 Down-regulation of translation factors during iron starvation will have to be examined at  
488 the protein level to determine its contribution to adaptation to iron starvation and  
489 development of persistence.

490

491 In contrast to down-regulation of translation, iron starvation increases transcription of  
492 amino-acyl synthesis genes (*cysS*, *pheT*, *glyQ*, *aspS*, *thrS*), which are responsible for

493 charging tRNAs with amino acids. The apparent disconnect between increased amino-  
494 acyl-tRNA pools and decreased translation indicates possible survival mechanisms.  
495 Charged tRNAs might be utilized in an immediate survival response to iron-starvation,  
496 prior to the turnover of ribosomal subunits. Alternatively, *Chlamydia* may be  
497 accumulating charged tRNAs for recovery and resumption of development when normal  
498 levels of iron and translation factors are restored.

499  
500 Multiple amino acid synthesis, inter-conversion, and uptake mechanisms were up-  
501 regulated in response to short-term iron starvation. Surprisingly, the primary response  
502 includes an increase in transcripts involved in tryptophan salvage, *trpB* and *trpA*, but not  
503 the tryptophan-dependent repressor *trpR*. TrpR-dependent regulation of *trpRBA*  
504 transcription has been extensively studied during tryptophan starvation and IFN-g  
505 treatment, but rarely, if ever, in the context of iron-starvation (50, 74, 75). Notably, *trpB*,  
506 but not *trpR* levels were also increased under estradiol-induced persistence, suggesting  
507 a *trpR*-independent mechanism of inducing tryptophan salvage transcription may exist  
508 (76).

509  
510 A major theme that emerged from our gene expression analysis is that *Chlamydia*  
511 likely perceives iron starvation as a signal to prepare for further nutrient deprivation and  
512 immune insult. Transcriptional up-regulation of tryptophan salvage pathway (*trpB*, *trpA*),  
513 oxidative stress (*ahpC*, *pdi*, and *sodM*) and DNA repair (*mutS*, *mutL*, *ssb*, *ung*, *recA*)  
514 genes indicate a protective response against antimicrobial insults of the inflammatory  
515 immune response (e.g. IDO activation, reactive oxygen species). As an obligate



516 intracellular pathogen, *Chlamydia* has undergone reductive evolution with constant  
517 selective pressure from the host immune system and its multiple anti-chlamydial  
518 effectors. Due to its small genome (~ 1 Mbp), *Chlamydia* may not have the capability to  
519 induce a specific transcriptional response to each particular stressor, and the  
520 simultaneous deployment of stress responses may have been the most parsimonious  
521 route of adaptation to immune insult. In this case, we would expect that iron-starved  
522 *Chlamydia* would be better protected from damage by antimicrobial insults than mock-  
523 treated *Chlamydia*. Immediate transcriptional responses to other stress conditions will  
524 need to be monitored to determine if this coordination of antimicrobial responses is  
525 unique to iron starvation.

526

527 This study provides the first evidence of an iron-dependent regulon for *C.*  
528 *trachomatis*. By using a systems-approach to delineate *Chlamydia*'s transcriptional  
529 response to iron starvation, we have been able to detect biological pathways and place  
530 them in the context of chlamydial development. These findings are novel, and add to  
531 previous studies of iron-dependent transcriptional and proteomic profiling in aberrant  
532 RBs, revealing transcriptional adaptive strategies prior to the development of a  
533 persistent state. Additionally, our results include a high-resolution profile of mid-cycle  
534 development of *C. trachomatis* serovar L2, including relevant time points for monitoring  
535 shifts in early, mid, and late-cycle gene expression. We expect this dataset will prove  
536 useful for future studies that seek to determine *Chlamydia*'s immediate transcriptional  
537 response to other chemical and/or nutrient stresses. Our findings include previously  
538 unrecognized shifts in energy utilization and down-regulation of translation that

539 resemble a stringent-like survival response. *Chlamydia* may utilize a two-stage  
540 approach of increasing transcription of survival genes in the short term to delay  
541 development and survive during iron-starvation, followed by an eventual shutdown of  
542 translation at later times of sustained stress. The latter might account for the observed  
543 irreversibility of the persistent state during long-term starvation for iron or tryptophan.

544

## 545 MATERIALS AND METHODS

### 546 **Cell Culture and infection**

547 HeLa monolayers were infected with *C. trachomatis* strain L2 434/Bu in 6-well plates at  
548 a multiplicity of infection (MOI) of 2 for RNA and gDNA collection experiments, and on  
549 coverslips in 24-well plates for morphology studies. Cells were grown in DMEM  
550 supplemented with 10% FBS, 2 mM glutamine, and 10 micrograms/mL gentamycin in  
551 5% CO<sub>2</sub> at 37° C. HeLa cells used in this study were started from P1 stocks from ATCC,  
552 and were regularly checked for contamination by DAPI-staining and the Universal  
553 Mycoplasma detection kit (ATCC).

554

### 555 **RNA-sequencing**

556 RNA was collected and pooled from 2 or 4 T75 flasks of *C. trachomatis*-infected HeLa  
557 monolayers that had been treated with 100 µM 2,2-Bipyridyl (BPD) starting at 6 or 12h  
558 hours post-infection (6h + 3h BPD, 12h + 3h BPD, 12h + 6h BPD) and in mock-  
559 treated samples at equivalent timepoints post-infection (9h, 12h, 15h, 18h). RNA was  
560 purified using the RiboPure Bacteria (Ambion) kit as per manufacturers instructions.  
561 Total RNA was further enriched for transcripts over 100 nucleotides in length with the

562 MegaClear kit (Ambion). Mammalian transcripts and rRNAs were removed with the  
563 MicrobEnrich kit (Ambion) and bacterial rRNAs were removed using the MicrobExpress  
564 kit (Ambion), repeating 2-3 times. The integrity and quantity of total and depleted RNA  
565 was monitored with an AATI Fragment Analyzer. cDNA libraries were prepared with the  
566 Ion Total RNA-seq Kit V2, and sequencing beads prepared using an ion Chef, and  
567 sequencing performed on an Ion Proton chip with HiQ chemistry. Primary sequence  
568 analysis, trimming, and binning of reads was performed using Torrent Suite Software  
569 version 5.0.5. Remaining reads were mapped to the combined core genome of *C.*  
570 *trachomatis* strain L2 434/Bu (Genbank Accession: AM884176) and the plasmid of *C.*  
571 *trachomatis* L2b CS784/08 (NZ\_CP009926) using CLC Genomics Workbench 9,  
572 requiring reads be at least 30 nucleotides in length, with default alignment parameters.

573

574 The EdgeR algorithm in CLC Genomics was used to determine differential gene  
575 expression during development and iron-starvation, assuming a false-discovery rate of  
576 10% and p-values  $\leq 0.05$ . tRNAs and ribosomal RNAs were filtered from the reads to  
577 account for differences in depletion efficiency, and only genes with at least 5 mapped  
578 reads were included in the analysis. Differentially expressed genes were confirmed for  
579 selected transcripts by RT-qPCR.

580

### 581 **qPCR and RT-qPCR**

582 *C. trachomatis*-infected HeLa monolayers were treated with 100 micromolar BPD  
583 starting at 6 or 12h hours post-infection (6h + 3h BPD, 12h + 3h BPD, 12h + 6h  
584 BPD) and mock-treated samples at equivalent timepoints post-infection (6h, 9h, 12h,

585 15h, 18h). RNA and genomic DNA (gDNA) were collected with the RiboPure Bacteria  
586 and the DNeasy Blood and Tissue (Qiagen) kits, respectively. cDNA was generated  
587 with Superscript IV reverse transcriptase (Life Technologies) from 200-500 nanograms  
588 RNA as per manufacturer's instruction, except the use of random nonamers instead of  
589 hexamers. Transcripts were amplified with PowerUp SYBR Green system from  
590 undiluted cDNA for early (6-9h) or diluted 1:10 in 10 mM Tris for midcycle (12-18h)  
591 samples and detected with Applied Biosystems 7300 RT-qPCR system.

592

### 593 **Chlamydial morphology**

594 Chlamydiae were monitored for changes in morphology in response to mock-treatment  
595 or treatment with 100 micromolar BPD L starting at 12h post-infection for 3, 6, or 12h.  
596 Infected cultures were fixed on coverslips and stained with pooled human serum at  
597 1:750, followed by goat-anti-human antibody conjugated to Alexa Fluor 488  
598 (ThermoFisher) at 1:1000. DNA was stained with DAPI at 5 micrograms/mL. Images  
599 were taken on a Leica SP8 confocal microscope with a 63X oil-objective and 4X zoom.

600

### 601 **IFU assay**

602 Chlamydiae were monitored for changes in infectivity in response to mock-treatment or  
603 treatment with 100 micromolar BPD L starting at 12h post-infection for 12 or 24h, at an  
604 MOI of 1. Infected cultures were scraped into 300 microliters SPG and stored at -80 C  
605 for later testing. Thawed lysates were serially diluted into complete DMEM, centrifuged  
606 onto HeLa monolayers in 24-well plates, washed with HBSS, and allowed to infect for  
607 24h. Infected cultures were fixed and stained with pooled human serum at 1:750,

608 followed by goat-anti-human antibody conjugated to Alexa Fluor 488 (ThermoFisher) at  
609 1:1000. Inclusions were counted by fluorescent microscopy and inclusion-forming units  
610 (IFU) were calculated as previously described.

611

### 612 **Visual analysis of differentially expressed genes**

613 Functional categories were assigned for all genes differentially regulated with a p-value  
614  $\leq 0.01$  by referring to the GO terms listed on UniProt. Pie charts were generated using  
615 the “pie” function in Rstudio. Heatmaps were generated in Rstudio using the package  
616 “pheatmap”, with parameters set to average clustering and Euclidean distance. The  
617 Panther overexpression test in Panther v12.0 was done on differentially regulated gene  
618 sets (total) with p-values  $\leq 0.01$ , using the default parameters and Bonferri correction.  
619 Pathway analysis was performed on differentially regulated genesets with p-values  $\leq$   
620 0.05 with STRING-db v.10.5 set to confidence  $\geq 0.7$ . StringDB maps were slightly  
621 modified to make space for pathway labels, without altering network relationships.  
622 Clustered genes detected with StringDB were further analyzed using KeggMapper  
623 v.2.8, and pathway maps were generated based on KeggMapper output using Affinity  
624 Designer v1.4.1.

625

### 626 **Data availability**

627 Raw and processed sequencing files were submitted to the NCBI Gene Expression  
628 Omnibus (GEO) as a Superseries, and the mid-cycle and early-cycle projects can be  
629 found using accession number GSE106763.

630

631 ACKNOWLEDGEMENTS

632 We would like to acknowledge Dr. Scot Ouellette and Nicholas Pokorzynski for critical  
633 reading of the manuscript. This work was funded by start-up funds for R.A.C. from the  
634 School of Molecular Biosciences, College of Veterinary Medicine at Washington State  
635 University, NIH grant 2R01AI065545-06A1 awarded to R.A.C., and NIH training grant  
636 T32AI7025-36 for A.J.B.

637

638 REFERENCES

- 639 1. **CDC. 2016. Sexually Transmitted Disease Surveillance.** 2015. Atlanta: U.S.  
640 Department of Health and Human Services.
- 641 2. **Price MJ, Ades AE, Welton NJ, Simms I, Macleod J, Horner PJ.** 2016.  
642 proportion of pelvic inflammatory disease cases caused by *Chlamydia*  
643 *trachomatis*: consistent picture from different methods. *J Infect Dis* **214**:617–24.
- 644 3. **Kjaer HO, Dimcevski G, Hoff G, Olesen F, Ostergaard L.** 2000. Recurrence of  
645 urogenital *Chlamydia trachomatis* infection evaluated by mailed samples obtained  
646 at home: 24 weeks' prospective follow up study. *Sex Transm Infect* **76**:169–72.
- 647 4. **Batteiger BE, Tu W, Ofner S, Van Der Pol B, Stothard DR, Orr DP, Katz BP,**  
648 **Fortenberry JD. 2010.** Repeated *Chlamydia trachomatis* genital infections in  
649 adolescent women. *J Infect Dis* **201**:42–51.
- 650 5. **Wyrick PB. 2010.** *Chlamydia trachomatis* persistence *in vitro*: an overview. *J*  
651 *Infect Dis* **201**:88–95.
- 652 6. **Lewis ME, Belland RJ, AbdelRahman YM, Beatty WL, Aiyar AA, Zea AH,**  
653 **Greene SJ, Marrero L, Buckner LR, Tate DJ, McGowin CL, Kozlowski PA,**

- 654 **O'Brien M, Lillis RA, Martin DH, Quayle AJ.** 2014. Morphologic and molecular  
655 evaluation of *Chlamydia trachomatis* growth in human endocervix reveals distinct  
656 growth patterns. *Front Cell Infect Microbiol* **4**:71.
- 657 7. **AbdelRahman YM, Belland RJ.** 2005. The chlamydial developmental cycle.  
658 *FEMS Microbiol Rev* **29**:949–959.
- 659 8. **Matsumoto A, Manire GP.** 1970. Electron microscopic observations on the  
660 effects of penicillin on the morphology of *Chlamydia psittaci*. *J Bacteriol* **101**:278–  
661 85.
- 662 9. **Kazar J, Gillmore JD, Gordon FB.** 1971. Effect of Interferon and Interferon  
663 Inducers on Infections with a nonviral intracellular microorganism, *Chlamydia*  
664 *trachomatis*. *Infect Immun* **3**:825–32.
- 665 10. **Raulston JE.** 1997. Response of *Chlamydia trachomatis* serovar E to iron  
666 restriction *in vitro* and evidence for iron-regulated chlamydial proteins. *Infect*  
667 *Immun* **65**:4539–47.
- 668 11. **Byrne GI, Lehmann LK, Landry GJ.** 1986. Induction of tryptophan catabolism is  
669 the mechanism for gamma-interferon-mediated inhibition of intracellular  
670 *Chlamydia psittaci* replication in T24 cells. *Infect Immun* **53**:347–51.
- 671 12. **Beatty WL, Byrne GI, Morrison RP.** 1993. Morphologic and antigenic  
672 characterization of interferon gamma-mediated persistent *Chlamydia trachomatis*  
673 infection *in vitro*. *Proc Natl Acad Sci U S A* **90**:3998–4002.
- 674 13. **Beatty WL, Morrison RP, Byrne GI.** 1995. Reactivation of persistent *Chlamydia*  
675 *trachomatis* infection in cell culture. *Infect Immun* **63**:199–205.
- 676 14. **Belland RJ, Nelson DE, Virok D, Crane DD, Hogan D, Sturdevant D, Beatty**

- 677 **WL, Caldwell HD. 2003.** Transcriptome analysis of chlamydial growth during IFN-  
678 -mediated persistence and reactivation. *Proc Natl Acad Sci* **100**:15971–15976.
- 679 15. **Reveneau N, Crane DD, Fischer E, Caldwell HD. 2005.** Bactericidal activity of  
680 first-choice antibiotics against gamma interferon-induced persistent infection of  
681 human epithelial cells by *Chlamydia trachomatis*. *Antimicrob Agents Chemother*  
682 **49**:1787–93.
- 683 16. **Ouellette SP, Hatch TP, AbdelRahman YM, Rose LA, Belland RJ, Byrne GI.**  
684 2006. Global transcriptional upregulation in the absence of increased translation  
685 in *Chlamydia* during IFN $\gamma$ -mediated host cell tryptophan starvation. *Mol*  
686 *Microbiol* **62**:1387–401.
- 687 17. **Stephens RS, Kalman S, Lammel C, Fan J, Marathe R, Aravind L, Mitchell W,**  
688 **Olinger L, Tatusov RL, Zhao Q, Koonin E V., Davis RW. 1998.** Genome  
689 Sequence of an Obligate Intracellular Pathogen of Humans: *Chlamydia*  
690 *trachomatis*. *Science* **282**:754-9.
- 691 18. **Chen W. 2011.** IDO: more than an enzyme. *Nat Immunol* **12**:809–811.
- 692 19. **Byrd TF, Horwitz MA. 1989.** Interferon gamma-activated human monocytes  
693 downregulate transferrin receptors and inhibit the intracellular multiplication of  
694 *Legionella pneumophila* by limiting the availability of iron. *J Clin Invest* **83**:1457–  
695 1465.
- 696 20. **Nemeth E, Valore E V, Territo M, Schiller G, Lichtenstein A, Ganz T. 2003.**  
697 Hepcidin, a putative mediator of anemia of inflammation, is a type II acute-phase  
698 protein. *Blood* **101**:2461–2463.
- 699 21. **Ludwiczek S, Aigner E, Theurl I, Weiss G, Marx JJ, Brock J. 2003.** Cytokine-



- 700 mediated regulation of iron transport in human monocytic cells. *Blood* **101**:4148–  
701 54.
- 702 22. **Mpiga P, Ravaoarino M.** 2006. *Chlamydia trachomatis* persistence: An update.  
703 *Microbiol Res* **161**:9-19.
- 704 23. **Theurl I, Theurl M, Seifert M, Mair S, Nairz M, Rumpold H, Zoller H,**  
705 **Bellmann-Weiler R, Niederegger H, Talasz H, Weiss G.** 2008. Autocrine  
706 formation of hepcidin induces iron retention in human monocytes. *Blood*  
707 **111**:2392–9.
- 708 24. **Paradkar PN, De Domenico I, Durchfort N, Zohn I, Kaplan J, Ward DM.** 2008.  
709 Iron depletion limits intracellular bacterial growth in macrophages. *Blood* **112**:866–  
710 74.
- 711 25. **Nairz M, Haschka D, Demetz E, Weiss G.** 2014. Iron at the interface of immunity  
712 and infection. *Front Pharmacol* **5**:152.
- 713 26. **Pokorzynski ND, Thompson CC, Carabeo RA.** 2017. Ironing out the  
714 unconventional mechanisms of iron acquisition and gene regulation in *Chlamydia*.  
715 *Front Cell Infect Microbiol* **7**:394.
- 716 27. **Hentze MW, Muckenthaler MU, Galy B, Camaschella C.** 2010. Two to tango:  
717 regulation of Mammalian iron metabolism. *Cell* **142**:24–38.
- 718 28. **Vardhan H, Bhengraj AR, Jha R, Singh Mittal A.** 2009. *Chlamydia trachomatis*  
719 alters iron-regulatory protein-1 binding capacity and modulates cellular iron  
720 homeostasis in HeLa-229 cells. *J Biomed Biotechnol* 2009:342032. doi:  
721 10.1155/2009/342032.
- 722 29. **Kim I, Yetley EA, Calvo MS.** 1993. Variations in iron-status measures during the

- 723 menstrual cycle. *Am J Clin Nutr* **58**:705–9.
- 724 30. **Kelver ME, Kaul A, Nowicki B, Findley WE, Hutchens TW, Nagamani M.** 1996.  
725 Estrogen regulation of lactoferrin expression in human endometrium. *Am J*  
726 *Reprod Immunol* **36**:243–7.
- 727 31. **Aisen P, Enns C, Wessling-Resnick M.** 2001. Chemistry and biology of  
728 eukaryotic iron metabolism. *Int J Biochem Cell Biol* **33**:940–959.
- 729 32. **Skaar EP.** 2010. The battle for iron between bacterial pathogens and their  
730 vertebrate hosts. *PLoS Pathog* 6:e1000949. doi: 10.1371/journal.ppat.1000949.
- 731 33. **Caza M, Kronstad JW.** 2013. Shared and distinct mechanisms of iron acquisition  
732 by bacterial and fungal pathogens of humans. *Front Cell Infect Microbiol* **3**:80.
- 733 34. **Hood MI, Skaar EP.** 2012. Nutritional immunity: transition metals at the  
734 pathogen–host interface. *Nat Rev Microbiol* **10**:525–537.
- 735 35. **Pan X, Tamilselvam B, Hansen EJ, Daefler S.** 2010. Modulation of iron  
736 homeostasis in macrophages by bacterial intracellular pathogens. *BMC Microbiol*  
737 **10**:64.
- 738 36. **Scidmore MA, Fischer ER, Hackstadt T.** 2003. Restricted fusion of *Chlamydia*  
739 *trachomatis* vesicles with endocytic compartments during the initial stages of  
740 infection. *Infect Immun* **71**:973–84.
- 741 37. **Ouellette SP, Carabeo RA.** 2010. A functional slow recycling pathway of  
742 transferrin is required for growth of *Chlamydia*. *Front Microbiol* **1**:1–12.
- 743 38. **Boradia VM, Malhotra H, Thakkar JS, Tillu VA, Vuppala B, Patil P, Sheokand**  
744 **N, Sharma P, Chauhan AS, Raje M, Raje CI.** 2014. *Mycobacterium tuberculosis*  
745 acquires iron by cell-surface sequestration and internalization of human holo-

- 746 transferrin. *Nat Commun* **5**:4730.
- 747 39. **Raulston JE, Miller JD, Davis CH, Schell M, Baldwin A, Ferguson K, Lane H.**  
748 2007. Identification of an iron-responsive protein that is antigenic in patients with  
749 *Chlamydia trachomatis* genital infections. *FEMS Immunol Med Microbiol* **51**:569–  
750 76.
- 751 40. **Miller JD, Sal MS, Schell M, Whittimore JD, Raulston JE.** 2009. *Chlamydia*  
752 *trachomatis* YtgA is an iron-binding periplasmic protein induced by iron restriction.  
753 *Microbiology* **155**:2884–94.
- 754 41. **Thompson CC, Nicod SS, Malcolm DS, Grieshaber SS, Carabeo RA.** 2012.  
755 Cleavage of a putative metal permease in *Chlamydia trachomatis* yields an iron-  
756 dependent transcriptional repressor. *Proc Natl Acad Sci U S A* **109**:10546–51.
- 757 42. **Thompson CC, Carabeo RA.** 2011. An optimal method of iron starvation of the  
758 obligate intracellular pathogen, *Chlamydia trachomatis*. *Front Microbiol* **2**:20.
- 759 43. **LaRue RW, Dill BD, Giles DK, Whittimore JD, Raulston JE.** 2007. Chlamydial  
760 Hsp60-2 is iron responsive in *Chlamydia trachomatis* serovar E-infected human  
761 endometrial epithelial cells *in vitro*. *Infect Immun* **75**:2374–80.
- 762 44. **Dill BD, Dessus-Babus S, Raulston JE.** 2009. Identification of iron-responsive  
763 proteins expressed by *Chlamydia trachomatis* reticulate bodies during intracellular  
764 growth. *Microbiology* **155**:210–9.
- 765 45. **Timms P.** 2009. Differential transcriptional responses between the interferon-  
766 gamma-induction and iron-limitation models of persistence for *Chlamydia*  
767 *pneumoniae*. *J Microbiol Immunol Infect* **42**:27-37.
- 768 46. **Consortium U.** 2017. UniProt: the universal protein knowledgebase. *Nucleic*

- 769 Acids Res **45**:D158–D169.
- 770 47. **Szklarczyk D, Franceschini A, Wyder S, Forslund K, Heller D, Huerta-Cepas**  
771 **J, Simonovic M, Roth A, Santos A, Tsafou KP, Kuhn M, Bork P, Jensen LJ,**  
772 **von Mering C.** 2015. STRING v10: protein-protein interaction networks,  
773 integrated over the tree of life. *Nucleic Acids Res* **43**:D447–D452.
- 774 48. **Kanehisa M, Goto S, Sato Y, Furumichi M, Tanabe M.** 2012. KEGG for  
775 integration and interpretation of large-scale molecular data sets. *Nucleic Acids*  
776 *Res* **40**:D109-14.
- 777 49. **Fehlner-Gardiner C, Roshick C, Carlson JH, Hughes S, Belland RJ, Caldwell**  
778 **HD, McClarty G.** 2002. Molecular basis defining human *Chlamydia trachomatis*  
779 tissue tropism. A possible role for tryptophan synthase. *J Biol Chem* **277**:26893–  
780 903.
- 781 50. **Wood H, Fehlner-Gardner C, Berry J, Fischer E, Graham B, Hackstadt T,**  
782 **Roshick C, McClarty G.** 2003. Regulation of tryptophan synthase gene  
783 expression in *Chlamydia trachomatis*. *Mol Microbiol* **49**:1347–1359.
- 784 51. **Caldwell HD, Wood H, Crane D, Bailey R, Jones RB, Mabey D, Maclean I,**  
785 **Mohammed Z, Peeling R, Roshick C, Schachter J, Solomon AW, Stamm WE,**  
786 **Suchland RJ, Taylor L, West SK, Quinn TC, Belland RJ, McClarty G.** 2003.  
787 Polymorphisms in *Chlamydia trachomatis* tryptophan synthase genes differentiate  
788 between genital and ocular isolates. *J Clin Invest* **111**:1757–69.
- 789 52. **Karayiannis P, Hobson D.** 1981. Amino acid requirements of a *Chlamydia*  
790 *trachomatis* genital strain in McCoy cell cultures. *J Clin Microbiol* **13**:427–32.
- 791 53. **Al-Younes HM, Gussmann J, Braun PR, Brinkmann V, Meyer TF.** 2006.

- 792 Naturally occurring amino acids differentially influence the development of  
793 *Chlamydia trachomatis* and *Chlamydia (Chlamydophila) pneumoniae*. J Med  
794 Microbiol **55**:879–886.
- 795 54. **Braun PR, Al-Younes H, Gussmann J, Klein J, Schneider E, Meyer TF.** 2008.  
796 Competitive inhibition of amino acid uptake suppresses chlamydial growth:  
797 involvement of the chlamydial amino acid transporter BrnQ. J Bacteriol **190**:1822–  
798 1830.
- 799 55. **Kane CD, Vena RM, Ouellette SP, Byrne GI.** 1999. intracellular tryptophan pool  
800 sizes may account for differences in gamma interferon-mediated inhibition and  
801 persistence of chlamydial growth in polarized and nonpolarized cells. Infect  
802 Immun **67**:1666–1671.
- 803 56. **Leonhardt RM, Lee SJ, Kavathas PB, Cresswell P.** 2007. Severe tryptophan  
804 starvation blocks onset of conventional persistence and reduces reactivation of  
805 *Chlamydia trachomatis*. Infect Immun **75**:5105–5117.
- 806 57. **Mi H, Huang X, Muruganujan A, Tang H, Mills C, Kang D, Thomas PD.** 2017.  
807 PANTHER version 11: expanded annotation data from Gene Ontology and  
808 Reactome pathways, and data analysis tool enhancements. Nucleic Acids Res  
809 **45**:D183–D189.
- 810 58. **Caspi R, Billington R, Ferrer L, Foerster H, Fulcher CA, Keseler IM, Kothari**  
811 **A, Krummenacker M, Latendresse M, Mueller LA, Ong Q, Paley S,**  
812 **Subhraveti P, Weaver DS, Karp PD.** 2016. The MetaCyc database of metabolic  
813 pathways and enzymes and the BioCyc collection of pathway/genome databases.  
814 Nucleic Acids Res **44**:D471–D480.

- 815 59. **Liechti GW, Kuru E, Hall E, Kalinda A, Brun Y V., VanNieuwenhze M, Maurelli**  
816 **AT.** 2013. A new metabolic cell-wall labelling method reveals peptidoglycan in  
817 *Chlamydia trachomatis*. *Nature* **506**:507–510.
- 818 60. **Soupene E, Wang D, Kuypers FA.** 2015. Remodeling of host  
819 phosphatidylcholine by *Chlamydia* acyltransferase is regulated by acyl-CoA  
820 binding protein ACBD6 associated with lipid droplets. *Microbiologyopen* **4**:235.
- 821 61. **Al-Younes HM, Rudel T, Brinkmann V, Szczepek AJ, Meyer TF.** 2001. Low  
822 iron availability modulates the course of *Chlamydia pneumoniae* infection. *Cell*  
823 *Microbiol* **3**:427–437.
- 824 62. **Mäurer AP, Mehlitz A, Mollenkopf HJ, Meyer TF.** 2007. Gene expression  
825 profiles of *Chlamydophila pneumoniae* during the developmental cycle and iron  
826 depletion-mediated persistence. *PLoS Pathog* **3**:0752–0769.
- 827 63. **Mukhopadhyay S, Miller RD, Sullivan ED, Theodoropoulos C, Mathews SA,**  
828 **Timms P, Summersgill JT.** 2006. Protein expression profiles of *Chlamydia*  
829 *pneumoniae* in models of persistence versus those of heat shock stress  
830 response. *Infect Immun* **74**:3853–3863.
- 831 64. **Jain V, Kumar M, Chatterji D.** 2006. ppGpp: stringent response and survival. *J*  
832 *Microbiol* **44**:1–10.
- 833 65. **Potrykus K, Murphy H, Philippe N, Cashel M.** 2011. ppGpp is the major source  
834 of growth rate control in *E. coli*. *Environ Microbiol* **13**:563–575.
- 835 66. **Perederina A, Svetlov V, Vassilyeva MN, Tahirov TH, Yokoyama S,**  
836 **Artsimovitch I, Vassilyev DG.** 2004. regulation through the secondary  
837 channel—structural framework for ppGpp-DksA synergism during transcription.

- 838 Cell **118**:297–309.
- 839 67. **Cashel M.** 1969. The control of ribonucleic acid synthesis in *Escherichia coli*. IV.  
840 Relevance of unusual phosphorylated compounds from amino acid-starved  
841 stringent strains. J Biol Chem **244**:3133–41.
- 842 68. **Haseltine WA, Block R.** 1973. Synthesis of guanosine tetra- and  
843 pentaphosphate requires the presence of a codon-specific, uncharged transfer  
844 ribonucleic acid in the acceptor site of ribosomes. Proc Natl Acad Sci U S A  
845 **70**:1564–8.
- 846 69. **Traxler MF, Summers SM, Nguyen H-T, Zacharia VM, Hightower GA, Smith  
847 JT, Conway T.** 2008. The global, ppGpp-mediated stringent response to amino  
848 acid starvation in *Escherichia coli*. Mol Microbiol **68**:1128–1148.
- 849 70. **Mittenhuber G.** 2001. Comparative genomics and evolution of genes encoding  
850 bacterial (p)ppGpp synthetases/hydrolases (the Rel, RelA and SpoT proteins). J  
851 Mol Microbiol Biotechnol **3**:585–600.
- 852 71. **Ouellette SP, Rueden KJ, Rucks EA.** 2016. tryptophan codon-dependent  
853 transcription in *Chlamydia pneumoniae* during gamma interferon-mediated  
854 tryptophan limitation. Infect Immun **84**:2703–2713.
- 855 72. **Lo C-C, Xie G, Bonner CA, Jensen RA.** 2012. The alternative translational  
856 profile that underlies the immune-evasive state of persistence in Chlamydiaceae  
857 exploits differential tryptophan contents of the protein repertoire. Microbiol Mol  
858 Biol Rev **76**:405–443.
- 859 73. **Bonner CA, Byrne GI, Jensen RA.** 2014. *Chlamydia* exploit the mammalian  
860 tryptophan-depletion defense strategy as a counter-defensive cue to trigger a

- 861 survival state of persistence. *Front Cell Infect Microbiol* **4**:17.
- 862 74. **Akers JC, Tan M.** 2006. Molecular mechanism of tryptophan-dependent  
863 transcriptional regulation in *Chlamydia trachomatis*. *J Bacteriol* **188**:4236–4243.
- 864 75. **Carlson JH, Wood H, Roshick C, Caldwell HD, McClarty G.** 2006. *In vivo* and  
865 *in vitro* studies of *Chlamydia trachomatis* TrpR:DNA interactions. *Mol Microbiol*  
866 **59**:1678–91.
- 867 76. **Amirshahi A, Wan C, Beagley K, Latter J, Symonds I, Timms P.** 2011.  
868 Modulation of the *Chlamydia trachomatis in vitro* transcriptome response by the  
869 sex hormones estradiol and progesterone. *BMC Microbiol* **11**:150.
- 870 77. **Rosenkranz HS, Gutter B, Becker Y.** 1973. Studies on the developmental cycle  
871 of *Chlamydia trachomatis*: selective inhibition by hydroxyurea. *J Bacteriol*  
872 **115**:682–90.
- 873 78. **Dassama LMK, Boal AK, Krebs C, Rosenzweig AC, Bollinger JM.** 2012.  
874 Evidence that the  $\beta$  subunit of *Chlamydia trachomatis* ribonucleotide reductase is  
875 active with the manganese ion of its manganese(IV)/iron(III) cofactor in site 1. *J*  
876 *Am Chem Soc* **134**:2520–2523.
- 877 79. **Odsbu I, Morigen S, Skarstad K, Beckwith J, Beckwith J.** 2009. A reduction in  
878 ribonucleotide reductase activity slows down the chromosome replication fork but  
879 does not change its localization. *PLoS One* **4**:e7617. 10.3389/fmicb.2011.00020.
- 880
- 881
- 882



883 TABLES

Table 1. Summary of RNA-seq and mapping in this study.

| Sample     | Total reads | Mapped reads (%) | Average read length | Coverage | Unique reads (%) | Gene reads (%)  | Intergenic reads (%) |
|------------|-------------|------------------|---------------------|----------|------------------|-----------------|----------------------|
| 6+3BPD_01  | 31,783,753  | 94042 (0.3)      | 111.7               | 10.0     | 55784 (59)       | 72,201 (77)     | 21,841 (23)          |
| 6+3BPD_02  | 25,001,608  | 102978 (0.4)     | 100.6               | 9.9      | 62238 (60)       | 80076 (78)      | 22902 (22)           |
| 6+3BPD_03  | 26,362,915  | 81,301 (0.3)     | 111.6               | 8.7      | 42734 (53)       | 64,148 (79)     | 17153 (21)           |
| 9h_01      | 26,391,673  | 76603 (0.3)      | 104.3               | 7.6      | 48,904 (64)      | 59,462 (78)     | 17,141 (22)          |
| 9h_02      | 18,899,700  | 126725 (0.7)     | 111.1               | 13.5     | 82938 (65)       | 101,114 (80)    | 25,611 (20)          |
| 9h_03      | 24,659,022  | 110,564 (0.5)    | 119.6               | 12.6     | 59,941 (54)      | 88,214 (80)     | 22,350 (20)          |
| 12h_01     | 11,406,647  | 1,183,621 (10)   | 133.7               | 151.0    | 1014565 (86)     | 972,501 (82)    | 211,120 (18)         |
| 12h_02     | 18,794,400  | 1,826,559 (10)   | 132                 | 230.0    | 1,532,588 (84)   | 1,502,698 (82)  | 323,861 (18)         |
| 12h_03     | 6,105,409   | 674,170 (11)     | 92.7                | 59.7     | 599,579 (89)     | 541,378 (80)    | 132,792 (20)         |
| 12h_04     | 5,490,040   | 275,903 (5)      | 122.3               | 32.2     | 228,625 (83)     | 216,560 (78)    | 59,343 (22)          |
| 12h_05     | 5,238,854   | 164239 (3)       | 124.1               | 19.5     | 127329 (78)      | 130,139 (79)    | 34,046 (21)          |
| 12+3BPD_01 | 12,936,290  | 1,446,925 (11)   | 123.6               | 170.9    | 1,320,489 (91)   | 1,2241,509 (86) | 205,416 (14)         |
| 12+3BPD_02 | 14,147,695  | 1054535 (7)      | 129.6               | 130.6    | 962069 (91)      | 902519 (86)     | 152,016 (14)         |
| 12+3BPD_03 | 8,479,156   | 791,034 (9)      | 97.8                | 73.9     | 685,947 (87)     | 644,706 (82)    | 146,328 (18)         |
| 12+3BPD_04 | 4,628,453   | 1,044,587 (23)   | 131.2               | 131.0    | 870,713 (83)     | 812,561 (78)    | 232,026 (22)         |
| 12+3BPD_05 | 4,817,344   | 536875 (11)      | 122                 | 62.6     | 418,855 (78)     | 421,924 (79)    | 114,951 (21)         |
| 15h_01     | 29,595,055  | 5499663 (19)     | 129.8               | 682.2    | 5106298 (93)     | 4,947,981 (90)  | 551,682 (10)         |
| 15h_02     | 22,517,134  | 2,643,605 (12)   | 117.3               | 60.2     | 915,409 (35)     | 2,348,719 (89)  | 294886 (11)          |
| 15h_03     | 11,378,770  | 239,110 (2)      | 100.3               | 22.9     | 112,935 (47)     | 202,415 (85)    | 36,695 (15)          |
| 15h_04     | 3,758,844   | 115863 (3)       | 106.5               | 11.8     | 73,387 (63)      | 95,335 (82)     | 20,528 (18)          |
| 12+6BPD_01 | 12,105,447  | 1,723,006 (14)   | 117.9               | 194.1    | 1,419,066 (82)   | 1,421,098 (82)  | 301,908 (18)         |
| 12+6BPD_02 | 14,751,746  | 1,131,903 (8)    | 111.6               | 120.7    | 912,764 (81)     | 907,278 (80)    | 224,625 (20)         |
| 12+6BPD_03 | 13,949,255  | 2,024,141 (15)   | 96                  | 185.7    | 1,812,201 (90)   | 1666346 (82)    | 357795 (18)          |
| 18h_01     | 18,794,400  | 1,826,559 (10)   | 109.2               | 190.6    | 1,532,588 (84)   | 1,502,698 (82)  | 323,861 (18)         |
| 18h_02     | 13,002,450  | 553,409 (4)      | 117.3               | 62.0     | 470,659 (85)     | 454,119 (82)    | 99,290 (18)          |
| 18h_03     | 10,676,991  | 1,589,307 (15)   | 91.9                | 139.6    | 1,441,562 (31)   | 1,287,668 (81)  | 301,639 (19)         |

884

**Table 2. Differentially expressed genes after 3h BPD treatment during mid-cycle development.**

| Feature ID                | Locus tag | Fold change | P-value  | FDR P-value correction | Annotation                                                          | Functional category            | UniProtKB ID |
|---------------------------|-----------|-------------|----------|------------------------|---------------------------------------------------------------------|--------------------------------|--------------|
| <i>CTL0013</i>            | CTL0013   | 3.45        | 3.10E-04 | 0.02                   | hypothetical, YGGT family                                           | Hypothetical                   | A0A0H3MB25   |
| <i>trpB</i>               | CTL0423   | 3.18        | 3.23E-07 | 2.86E-04               | tryptophan synthase subunit B                                       | Amino acid biosynthesis        | A0A0H3MD30   |
| <i>glgA</i>               | CTL0167   | 2.95        | 1.24E-04 | 8.99E-03               | glycogen synthase                                                   | Energy Metabolism              | B0B925       |
| <i>murB</i>               | CTL0203   | 2.52        | 6.41E-03 | 0.11                   | UDP-N-acetylenolpyruvoylglucosamine reductase                       | Other                          | B0B960       |
| <i>CTL0525</i>            | CTL0525   | 2.38        | 4.53E-05 | 5.02E-03               | TPR-containing domain                                               | Hypothetical                   | A0A0H3MKX6   |
| <i>recA</i>               | CTL0018   | 2.21        | 1.98E-03 | 0.06                   | recombinase A                                                       | DNA replication and repair     | B0B8M5       |
| <i>CTL0339</i>            | CTL0339   | 2.2         | 2.29E-03 | 0.06                   | phosphatidylcholine-hydrolyzing phospholipase                       | Other                          | A0A0H3MICY1  |
| <i>aroL</i>               | CTL0621   | 2.13        | 6.56E-03 | 0.11                   | shikimate kinase 2                                                  | Amino acid biosynthesis        | A0A0H3MDG7   |
| <i>hemE</i>               | CTL0116   | 2.09        | 1.68E-03 | 0.05                   | uroporphyrinogen decarboxylase                                      | Cofactor biosynthesis          | B0B8X3       |
| <i>CTL0408</i>            | CTL0408   | 2.08        | 1.36E-05 | 1.87E-03               | MIR, MAC/perforin domain-containing protein                         | Other                          | A0A0H3MGT6   |
| <i>rrnA</i>               | CTL0199   | 2           | 1.48E-05 | 1.87E-03               | Ribonucleoside-diphosphate reductase                                | DNA replication and repair     | A0A0H3MCP2   |
| <i>mqnD</i>               | CTL0514   | 2           | 2.45E-03 | 0.06                   | 1,4-dihydroxy-6-naphthoate synthase                                 | Cofactor biosynthesis          | A0A0H3MCI3   |
| <i>CTL0704</i>            | CTL0704   | 1.99        | 0.01     | 0.16                   | hypothetical                                                        | Hypothetical                   | A0A0H3MCH5   |
| <i>trpA</i>               | CTL0424   | 1.94        | 4.15E-03 | 8.00E-02               | tryptophan synthase subunit A                                       | Amino acid biosynthesis        | A0A0H3MKP4   |
| <i>CTL0255</i>            | CTL0255   | 1.93        | 4.37E-03 | 0.09                   | hypothetical                                                        | Hypothetical                   | A0A0H3MGJ2   |
| <i>pepF</i>               | CTL0367   | 1.9         | 6.17E-04 | 0.03                   | endopeptidase F                                                     | Protein processing and folding | A0A0H3MKK2   |
| <i>mc</i>                 | CTL0549   | 1.89        | 0.01     | 0.14                   | ribonuclease III                                                    | Transcriptional regulation     | B0B7L3       |
| <i>CTL0823</i>            | CTL0823   | 1.88        | 7.21E-04 | 0.03                   | hypothetical                                                        | Hypothetical                   | A0A0H3MLF6   |
| <i>CTL0301</i>            | CTL0301   | 1.81        | 1.32E-04 | 8.99E-03               | probable cytosolic aminopeptidase pepA                              | Protein processing and folding | B0B9F3       |
| <i>CTL0884</i>            | CTL0884   | 1.81        | 7.04E-03 | 0.11                   | hypothetical                                                        | Hypothetical                   | A0A0H3MCL0   |
| <i>CTL0885</i>            | CTL0885   | 1.77        | 3.48E-03 | 0.08                   | hypothetical effector                                               | Type III Secretion             | A0A0H3MHM9   |
| <i>lpcA</i>               | CTL0820   | 1.76        | 3.80E-03 | 0.08                   | dihydrolypolyl dehydrogenase                                        | Energy Metabolism              | A0A0H3MHJ2   |
| <i>CTL0096</i>            | CTL0096   | 1.72        | 1.98E-04 | 0.01                   | putative cation transporting ATPase                                 | Nutrient transport             | A0A0H3MCG9   |
| <i>gp6D</i>               | CTL0846   | 1.72        | 2.77E-03 | 0.07                   | virulence plasmid pGPe-D related protein                            | Hypothetical                   | A0A0H3MLH1   |
| <i>dnaQ</i>               | CTL0513   | 1.69        | 0.01     | 0.15                   | DNA polymerase III subunit epsilon                                  | DNA replication and repair     | A0A0H3MKW6   |
| <i>CTL0512</i>            | CTL0512   | 1.68        | 4.52E-03 | 0.09                   | mcs, secretion chaperone                                            | Type III Secretion             | A0A0H3MDA7   |
| <i>CTL0847</i>            | CTL0847   | 1.63        | 6.69E-03 | 0.11                   | hypothetical                                                        | Hypothetical                   | A0A0H3MCR9   |
| <i>oppA3</i>              | CTL0450   | 1.61        | 9.20E-03 | 0.13                   | oligopeptide transporter                                            | Nutrient transport             | A0A0H3MKR3   |
| <i>CTL0102</i>            | CTL0102   | 1.6         | 7.09E-03 | 0.11                   | putative exported protein                                           | Hypothetical                   | A0A0H3MG91   |
| <i>lfpA</i>               | CTL0821   | 1.59        | 8.90E-03 | 0.13                   | lipioic acid synthase                                               | Other                          | B0B8D2       |
| <i>pheT</i>               | CTL0736   | 1.59        | 0.01     | 0.17                   | phenylalanine-tRNA ligase beta subunit                              | Translation                    | A0A0H3MHF2   |
| <i>cysS</i>               | CTL0151   | 1.56        | 2.47E-03 | 0.06                   | cysteinyI-IRNA synthetase                                           | Translation                    | A0A0H3MGC2   |
| <i>CTL0055</i>            | CTL0055   | 1.51        | 7.04E-03 | 0.11                   | hypothetical                                                        | Hypothetical                   | A0A0H3MAN0   |
| <i>pal</i>                | CTL0863   | 1.51        | 7.29E-03 | 0.11                   | peptidoglycan-associated lipoprotein                                | Other                          | A0A0H3MDU9   |
| <i>thrS</i>               | CTL0844   | 1.48        | 6.31E-03 | 0.11                   | threonine-tRNA ligase                                               | Translation                    | B0B8F5       |
| <i>CTL0476</i>            | CTL0476   | 1.48        | 0.01     | 0.15                   | candidate inclusion membrane protein                                | Hypothetical                   | A0A0H3MKT3   |
| <i>CTL0043</i>            | CTL0043   | 1.46        | 0.01     | 0.15                   | type III secretion structural protein                               | Type III Secretion             | A0A0H3MG59   |
| <i>glmS</i>               | CTL0188   | 1.46        | 0.01     | 0.16                   | Glutamine-fructose-6-phosphate aminotransferase                     | Energy Metabolism              | A0A0H3MCO0   |
| <i>CTL0684</i>            | CTL0684   | 1.45        | 8.29E-03 | 0.12                   | hypothetical                                                        | Hypothetical                   | A0A0H3MCF9   |
| <i>nusA</i>               | CTL0352   | -1.48       | 4.90E-03 | 0.09                   | transcription termination factor                                    | Transcriptional regulation     | A0A0H3MGQ1   |
| <i>prfA</i>               | CTL0278   | -1.56       | 9.49E-03 | 0.13                   | Peptide chain release factor RF1                                    | Translation                    | B0B9D0       |
| <i>rplW</i>               | CTL0788   | -1.58       | 5.43E-04 | 0.02                   | ribosomal subunit                                                   | Translation                    | B0B8A0       |
| <i>CTL0326</i>            | CTL0326   | -1.62       | 6.61E-03 | 0.11                   | ytgD, ABC transport protein, membrane permeability protein          | Nutrient transport             | A0A0H3MGN6   |
| <i>trpF</i>               | CTL0581   | -1.67       | 2.26E-03 | 0.06                   | N-(5'-phosphoribosyl)anthranilate isomerase                         | Cofactor biosynthesis          | B0B7P4       |
| <i>folX</i>               | CTL0878   | -1.68       | 7.23E-03 | 0.11                   | Dihydrooneopterin triphosphate 2'-epimerase                         | Cofactor biosynthesis          | A0A0H3MCK6   |
| <i>pgsA_2</i>             | CTL0757   | -1.71       | 1.74E-03 | 0.05                   | CDP-diaclyglycerol-glycerol-3-phosphate 3-phosphatidyltransferase   | Other                          | A0A0H3MHG9   |
| <i>sodM</i>               | CTL0546   | -1.74       | 1.46E-03 | 0.05                   | superoxide dismutase                                                | Redox homeostasis              | A0A0H3MKY6   |
| <i>CTL0138</i>            | CTL0138   | -1.74       | 4.48E-03 | 0.09                   | ribosomal silencing factor RsfS                                     | Translation                    | A0A0H3MAQ8   |
| <i>CTL0061</i>            | CTL0061   | -1.75       | 2.26E-04 | 0.01                   | inorganic phosphate transporter                                     | Nutrient transport             | A0A0H3MG71   |
| <i>CTL0486</i>            | CTL0486   | -1.77       | 3.48E-03 | 0.08                   | putative membrane transport protein                                 | Nutrient transport             | A0A0H3MBY7   |
| <i>gltT</i>               | CTL0658   | -1.85       | 3.07E-03 | 0.07                   | sodium:dicarboxylate symport protein                                | Nutrient transport             | A0A0H3MCC1   |
| <i>srpB</i>               | CTL0332   | -1.88       | 0.01     | 0.14                   | SsrA-binding protein                                                | Translation                    | A0A0H3MBC6   |
| <i>aroA</i>               | CTL0620   | -1.91       | 1.85E-04 | 0.01                   | 3-phosphoshikimate 1-carboxyvinyltransferase                        | Energy Metabolism              | B0B7T5       |
| <i>CTL0132</i>            | CTL0132   | -1.92       | 3.03E-03 | 0.07                   | UPF0109-containing putative RNA-binding protein                     | Translation                    | A0A0H3MAQ7   |
| <i>CTL0548</i>            | CTL0548   | -1.98       | 1.14E-04 | 8.99E-03               | dcrA, putative non-heme Fe(II) 2-oxoglutarate-dependent dioxygenase | Hypothetical                   | A0A0H3MBY2   |
| <i>secG</i>               | CTL0606   | -2.01       | 0.01     | 0.14                   | Protein-export membrane protein SecG                                | Protein processing and folding | A0A0H3MH61   |
| <i>rpsK</i>               | CTL0770   | -2.07       | 1.59E-06 | 4.79E-04               | ribosomal subunit                                                   | Translation                    | B0B882       |
| <i>rplT</i>               | CTL0207   | -2.07       | 1.62E-06 | 4.79E-04               | ribosomal subunit                                                   | Translation                    | B0B964       |
| <i>rplN</i>               | CTL0780   | -2.08       | 3.98E-03 | 0.08                   | ribosomal subunit                                                   | Translation                    | B0B892       |
| <i>CTL0720</i>            | CTL0720   | -2.12       | 5.09E-03 | 0.09                   | SWIB-domain containing protein                                      | Hypothetical                   | A0A0H3MCP5   |
| <i>gcsH</i>               | CTL0534   | -2.14       | 9.08E-04 | 0.03                   | glycine cleavage system H protein                                   | Amino acid biosynthesis        | B0B7J8       |
| <i>CTL0680</i>            | CTL0680   | -2.14       | 1.59E-03 | 0.05                   | putative rRNA processing peptidase                                  | Translation                    | A0A0H3MH61   |
| <i>rplM</i>               | CTL0206   | -2.14       | 1.75E-03 | 0.05                   | ribosomal subunit                                                   | Translation                    | A0A0H3MCP7   |
| <i>fer</i>                | CTL0315   | -2.26       | 6.48E-05 | 6.38E-03               | ferredoxin                                                          | Redox homeostasis              | A0A0H3MCW5   |
| <i>CTL0552</i>            | CTL0552   | -2.27       | 1.09E-03 | 0.04                   | TPR-containing domain                                               | Hypothetical                   | pseudogene   |
| <i>CTL0222</i>            | CTL0222   | -2.27       | 6.58E-03 | 0.11                   | hypothetical                                                        | Hypothetical                   | A0A0H3MK96   |
| <i>infA2</i>              | CTL0575   | -2.29       | 6.70E-06 | 1.19E-03               | Translation initiation factor IF-1                                  | Translation                    | A0A0H3MDD9   |
| <i>rpsT</i>               | CTL0881   | -2.38       | 1.13E-04 | 8.99E-03               | ribosomal subunit                                                   | Translation                    | B0B8J2       |
| <i>CTL0335</i>            | CTL0335   | -2.43       | 0.01     | 0.17                   | Putative integral membrane protein                                  | Hypothetical                   | A0A0H3MCX6   |
| <i>ltuA</i>               | CTL0631   | -2.68       | 3.38E-03 | 0.08                   | Late transcription unit A protein                                   | Hypothetical                   | A0A0H3MH76   |
| <i>rpsO</i>               | CTL0215   | -2.72       | 4.14E-04 | 0.02                   | ribosomal subunit                                                   | Translation                    | B0B972       |
| <i>ndk</i>                | CTL0762   | -2.76       | 7.97E-04 | 0.03                   | nucleoside diphosphate kinase                                       | DNA replication and repair     | B0B874       |
| <i>L2bCS78408_RS04755</i> | L2bCS7840 | -2.99       | 0.01     | 0.17                   | Virulence plasmid integrase pGP8-D                                  | DNA replication and repair     | B0BCM4       |
| <i>dut</i>                | CTL0544   | -3.02       | 6.06E-06 | 1.19E-03               | deoxyuridine 5'-triphosphate nucleotidohydrolase                    | DNA replication and repair     | B0B7K6       |
| <i>rplN</i>               | CTL0154   | -3.03       | 3.18E-04 | 0.02                   | ribosomal subunit                                                   | Translation                    | B0B912       |
| <i>CTL0021</i>            | CTL0021   | -3.16       | 0.01     | 0.17                   | hypothetical                                                        | Hypothetical                   | A0A0H3MG42   |

This data was exported from CLC Genomics Workbench 9.5.3. rRNAs, tRNAs, and Features (genes) with less than 10 reads in all samples were eliminated from the dataset prior to normalization and EDGE analysis, and only includes genes that were differentially expressed with a significance p-value  $\leq 0.01$ .

**Table 3. Differentially expressed genes after 6h BPD treatment during mid-cycle development.**

| Feature ID     | Locus Tag | P-value  | Fold change | FDR p-value correction | Annotation                                 | Functional category            | UniProtKB ID |
|----------------|-----------|----------|-------------|------------------------|--------------------------------------------|--------------------------------|--------------|
| <i>trpB</i>    | CTL0423   | 2.61E-07 | 3.5         | 2.32E-04               | tryptophan synthase subunit B              | Amino acid biosynthesis        | A0A0H3MD30   |
| <i>trpA</i>    | CTL0424   | 9.26E-06 | 3.21        | 2.73E-03               | tryptophan synthase subunit A              | Amino acid biosynthesis        | A0A0H3MKP4   |
| <i>nrdA</i>    | CTL0199   | 3.50E-06 | 2.39        | 1.55E-03               | ribonucleoside-diphosphate reductase       | DNA replication and repair     | A0A0H3MCP2   |
| <i>CTL0071</i> | CTL0071   | 6.73E-03 | 1.73        | 0.55                   | hypothetical                               | Hypothetical                   | A0A0H3MCG5   |
| <i>nrdB</i>    | CTL0200   | 9.34E-03 | 1.63        | 0.69                   | ribonucleoside-diphosphate reductase       | DNA replication and repair     | A0A0H3MK81   |
| <i>CTL0619</i> | CTL0619   | 1.68E-03 | -1.83       | 0.21                   | hypothetical integral membrane protein     | Hypothetical                   | A0A0H3MH71   |
| <i>capD</i>    | CTL0842   | 3.17E-03 | -2.13       | 0.31                   | type III secretion system protein          | Type III Secretion             | A0A0H3MHK7   |
| <i>scc2</i>    | CTL0839   | 1.37E-03 | -2.18       | 0.2                    | type III secretion system chaperone        | Type III Secretion             | A0A0H3MLG7   |
| <i>tsp</i>     | CTL0700   | 1.28E-03 | -2.34       | 0.2                    | tail-specific protease                     | Protein processing and folding | A0A0H3MDM0   |
| <i>CTL0185</i> | CTL0185   | 6.85E-03 | -2.76       | 0.55                   | hypothetical membrane protein              | Hypothetical                   | A0A0H3MAV2   |
| <i>capB</i>    | CTL0841   | 6.79E-05 | -2.81       | 0.02                   | type III secretion system membrane protein | Type III Secretion             | A0A0H3MCF0   |
| <i>CTL0840</i> | CTL0840   | 2.15E-03 | -2.97       | 0.24                   | hypothetical                               | Hypothetical                   | A0A0H3MCQ4   |

This data was exported from CLC Genomics Workbench 9.5.3. rRNAs, tRNAs, and Features (genes) with less than 10 reads in all samples were eliminated from the dataset prior to normalization and EDGE analysis. This data only includes genes that were differentially expressed with a significance p-value  $\leq$  0.01.

886

887

888

889

890

891

892

893

**Table 4. Differentially expressed genes after 3h BPD treatment during early-cycle development.**

| Feature ID       | Locus Tag | Fold change | P-value  | FDR P-value correction | Annotation                                      | Functional category            | UniProtKB ID |
|------------------|-----------|-------------|----------|------------------------|-------------------------------------------------|--------------------------------|--------------|
| <i>CTL0149</i>   | CTL0149   | 6.71        | 3.71E-03 | 0.09                   | protein disulfide isomerase                     | Redox homeostasis              | A0A0H3MAT1   |
| <i>CTL0184</i>   | CTL0184   | 3.4         | 4.44E-05 | 0.00493                | hypothetical inclusion membrane protein         | Hypothetical                   | A0A0H3MBD4   |
| <i>trpA</i>      | CTL0424   | 3.12        | 3.27E-04 | 0.02                   | tryptophan synthase subunit A                   | Amino acid biosynthesis        | A0A0H3MKP4   |
| <i>CTL0388</i>   | CTL0388   | 2.93        | 3.02E-03 | 0.08                   | hypothetical methyltransferase                  | Hypothetical                   | A0A0H3MKL6   |
| <i>CTL0111</i>   | CTL0111   | 2.89        | 0.000877 | 0.04                   | rRNA methyltransferase TrmA                     | Translation                    | A0A0H3MAQ4   |
| <i>hemN_1</i>    | CTL0115   | 2.47        | 1.00E-02 | 0.19                   | coproporphyrinogen-III oxidase                  | Cofactor biosynthesis          | A0A0H3MJY5   |
| <i>mip</i>       | CTL0803   | 2.37        | 3.97E-04 | 0.02                   | peptidyl-prolyl cis-trans isomerase             | Protein processing and folding | A0A0H3MDR1   |
| <i>trpB</i>      | CTL0423   | 2.28        | 2.55E-03 | 0.08                   | tryptophan synthase subunit B                   | Amino acid biosynthesis        | A0A0H3MD30   |
| <i>lpxB</i>      | CTL0668   | 2.28        | 0.00923  | 0.16                   | lipid-A-disaccharide synthase                   | Other                          | A0A0H3MDJ6   |
| <i>nrdB</i>      | CTL0200   | 2.12        | 1.57E-06 | 4.61E-04               | ribonucleoside-diphosphate reductase subunit B  | DNA replication and repair     | A0A0H3MK81   |
| <i>nrDA</i>      | CTL0199   | 2.09        | 4.10E-12 | 3.65E-09               | ribonucleoside-diphosphate reductase subunit A  | DNA replication and repair     | A0A0H3MCP2   |
| <i>CTL0874</i>   | CTL0874   | 2.04        | 2.07E-06 | 0.000461               | CADD,PABA synthase                              | Cofactor biosynthesis          | A0A0H3MHM3   |
| <i>CTL0360</i>   | CTL0360   | 2.04        | 8.59E-03 | 0.15                   | hypothetical                                    | Hypothetical                   | A0A0H3MKJ7   |
| <i>mutS</i>      | CTL0160   | 1.95        | 6.41E-06 | 1.08E-03               | DNA mismatch repair protein                     | DNA replication and repair     | B0B918       |
| <i>dnaQ</i>      | CTL0513   | 1.88        | 2.83E-03 | 0.08                   | DNA polymerase III subunit epsilon              | DNA replication and repair     | A0A0H3MKW6   |
| <i>CTL0164</i>   | CTL0164   | 1.86        | 1.20E-03 | 5.00E-02               | hypothetical exported protein                   | Hypothetical                   | A0A0H3MBC3   |
| <i>CTL0791</i>   | CTL0791   | 1.82        | 1.78E-07 | 7.92E-05               | hypothetical membrane protein                   | Hypothetical                   | A0A0H3MCL8   |
| <i>trpS</i>      | CTL0848   | 1.81        | 1.46E-03 | 0.05                   | tryptophan-tRNA ligase                          | Translation                    | A0A0H3MCF4   |
| <i>aspC_1</i>    | CTL0005   | 1.77        | 1.92E-05 | 0.00244                | aminotransferase                                | Amino acid biosynthesis        | A0A0H3MG09   |
| <i>eno</i>       | CTL0850   | 1.75        | 2.51E-03 | 0.08                   | enolase                                         | Energy Metabolism              | B0B8G1       |
| <i>CTL0408</i>   | CTL0408   | 1.73        | 3.50E-04 | 2.00E-02               | MIR, MAC/perforin domain-containing protein     | Other                          | A0A0H3MGT6   |
| <i>recA</i>      | CTL0018   | 1.72        | 1.49E-03 | 0.05                   | recombinase A                                   | DNA replication and repair     | B0B8M5       |
| <i>sodM</i>      | CTL0546   | 1.65        | 7.17E-03 | 0.14                   | superoxide dismutase                            | Redox homeostasis              | A0A0H3MKY6   |
| <i>brnQ</i>      | CTL0817   | 1.62        | 3.60E-04 | 2.00E-02               | branched chain amino acid transporter           | Nutrient transport             | A0A0H3MLF2   |
| <i>greA</i>      | CTL0004   | 1.59        | 2.63E-04 | 0.02                   | transcription elongation factor                 | Transcriptional regulation     | A0A0H3MAD9   |
| <i>CTL0102</i>   | CTL0102   | 1.58        | 4.63E-03 | 0.11                   | hypothetical exported protein                   | Hypothetical                   | A0A0H3MG91   |
| <i>ahpC</i>      | CTL0866   | 1.52        | 2.54E-03 | 8.00E-02               | thio-specific antioxidant peroxidase            | Redox homeostasis              | A0A0H3MCJ5   |
| <i>thrS</i>      | CTL0844   | 1.52        | 0.00501  | 0.11                   | threonine-tRNA ligase                           | Translation                    | B0B8F5       |
| <i>aspS</i>      | CTL0804   | 1.52        | 6.89E-03 | 0.14                   | aspartate-tRNA ligase                           | Translation                    | B0B8B6       |
| <i>rpoD</i>      | CTL0879   | 1.51        | 1.00E-02 | 0.18                   | RNA polymerase sigma factor RpoD                | Transcriptional regulation     | A0A0H3MHM6   |
| <i>glyA</i>      | CTL0691   | 1.47        | 0.00242  | 0.08                   | serine hydroxymethyltransferase                 | Amino acid biosynthesis        | B0B804       |
| <i>scfJ</i>      | CTL0822   | 1.43        | 7.93E-03 | 0.14                   | type III secretion protein                      | Type III Secretion             | A0A0H3MDS0   |
| <i>rpoC</i>      | CTL0566   | -1.28       | 7.87E-03 | 0.14                   | DNA-directed RNA polymerase subunit beta'       | Transcriptional regulation     | B0B7N0       |
| <i>L2bCS784C</i> | L2bCS784C | -1.36       | 4.91E-03 | 0.11                   | virulence plasmid integrase pGP8-D              | DNA replication and repair     | B0BCM4       |
| <i>rpIW</i>      | CTL0788   | -1.41       | 0.0035   | 0.09                   | ribosomal subunit                               | Translation                    | B0B8A0       |
| <i>prfA</i>      | CTL0278   | -1.44       | 5.80E-03 | 1.20E-01               | peptide chain release factor RF1                | Translation                    | B0B9D0       |
| <i>rpIC</i>      | CTL0790   | -1.52       | 4.30E-04 | 0.02                   | ribosomal subunit                               | Translation                    | B0B8A2       |
| <i>CTL0061</i>   | CTL0061   | -1.52       | 2.95E-03 | 0.08                   | inorganic phosphate transporter PHO4            | Nutrient transport             | A0A0H3MG71   |
| <i>CTL0659</i>   | CTL0659   | -1.57       | 9.75E-04 | 0.05                   | tetraacyldisaccharide 4'-kinase lpxK            | Other                          | A0A0H3MC42   |
| <i>CTL0473</i>   | CTL0473   | -1.57       | 1.22E-03 | 0.05                   | hypothetical exported protein                   | Hypothetical                   | A0A0H3MBQ9   |
| <i>incD</i>      | CTL0370   | -1.59       | 3.33E-03 | 0.09                   | inclusion membrane protein D                    | Other                          | B0B9M3       |
| <i>plsX</i>      | CTL0182   | -1.59       | 1.00E-02 | 0.19                   | phosphate acyltransferase                       | Other                          | B0B939       |
| <i>CTL0613</i>   | CTL0613   | -1.6        | 1.34E-03 | 0.05                   | hypothetical inner membrane protein             | Hypothetical                   | A0A0H3MC14   |
| <i>pmpA</i>      | CTL0669   | -1.63       | 0.00534  | 0.11                   | probable outer membrane protein PmpA            | Other                          | A0A0H3ML49   |
| <i>CTL0548</i>   | CTL0548   | -1.66       | 1.01E-03 | 0.05                   | hypothetical non-heme Fe(II) 2-oxoglutarate     | Hypothetical                   | A0A0H3MBY2   |
| <i>CTL0541</i>   | CTL0541   | -1.67       | 1.00E-02 | 0.22                   | hypothetical membrane protein                   | Hypothetical                   | A0A0H3MC35   |
| <i>sucB_2</i>    | CTL0311   | -1.7        | 7.85E-03 | 1.40E-01               | dihydrolipoyllysine-residue succinyltransferase | Energy Metabolism              | A0A0H3ML42   |
| <i>amn</i>       | CTL0120   | -1.71       | 4.71E-03 | 0.11                   | AMP nucleosidase                                | DNA replication and repair     | A0A0H3MGA3   |
| <i>mrsA</i>      | CTL0547   | -1.77       | 1.00E-02 | 0.19                   | phosphoglucomutase                              | Other                          | A0A0H3MC40   |
| <i>ftsY</i>      | CTL0192   | -1.82       | 4.26E-04 | 0.02                   | signal recognition particle receptor            | Translation                    | A0A0H3MGE5   |
| <i>CTL0609</i>   | CTL0609   | -1.85       | 7.29E-06 | 0.00108                | hypothetical exported protein                   | Hypothetical                   | A0A0H3MDF7   |
| <i>dnaX_1</i>    | CTL0439   | -1.92       | 5.15E-03 | 1.10E-01               | DNA polymerase III subunit gamma/tau            | DNA replication and repair     | A0A0H3MBM8   |
| <i>CTL0314</i>   | CTL0314   | -2.04       | 2.67E-04 | 0.02                   | hypothetical membrane protein                   | Hypothetical                   | A0A0H3MGM7   |
| <i>CTL0430</i>   | CTL0430   | -3.85       | 5.46E-05 | 0.00539                | hypothetical integral membrane protein          | Hypothetical                   | A0A0H3MBV0   |
| <i>CTL0063</i>   | CTL0063   | -3.89       | 2.61E-03 | 0.08                   | hypothetical                                    | Hypothetical                   | A0A0H3MCG4   |

This data was exported from CLC Genomics Workbench 9.5.3. rRNAs, tRNAs, and Features (genes) with less than 10 reads in all samples were eliminated from the dataset prior to normalization and EDGE analysis. This data only includes genes that were differentially expressed with a significance p-value  $\leq 0.01$ .

894

895

| Table 5: Translation factors differentially expressed during mid-cycle iron starvation. |                                |           |            |                                        |                       |                                                                                                     | Change in gene expression at 12+3h BPD |
|-----------------------------------------------------------------------------------------|--------------------------------|-----------|------------|----------------------------------------|-----------------------|-----------------------------------------------------------------------------------------------------|----------------------------------------|
| Gene                                                                                    | Direction of expression change | Locus tag | Protein ID | Annotation                             | Interacting component | Result of interaction                                                                               |                                        |
| <b>tRNA processing</b>                                                                  |                                |           |            |                                        |                       |                                                                                                     |                                        |
| <i>rnpA_1</i>                                                                           | decrease                       | CT10153   | Rnp1       | Ribonuclease P protein component       | tRNA                  | Cleaves the end of pre-tRNA                                                                         |                                        |
| <i>rnpA_2</i>                                                                           | decrease                       | CT10153A  | Rnp2       | Ribonuclease P protein component       | tRNA                  | Cleaves the end of pre-tRNA                                                                         |                                        |
| <b>tRNA biogenesis</b>                                                                  |                                |           |            |                                        |                       |                                                                                                     |                                        |
| <i>cysS</i>                                                                             | increase                       | CT10151   | CysS       | Cysteine-tRNA ligase                   | tRNA(Cys)             | Charges tRNA with cysteine                                                                          |                                        |
| <i>pheT</i>                                                                             | increase                       | CT10736   | PheT       | Phenylalanine-tRNA ligase beta subunit | tRNA(Phe)             | Charges tRNA with phenylalanine                                                                     |                                        |
| <i>glyQ</i>                                                                             | increase                       | CT10165   | glyQ       | Glycine-tRNA ligase alpha subunit      | tRNA(Gly)             | Charges tRNA with glycine                                                                           |                                        |
| <i>aspS</i>                                                                             | increase                       | CT10804   | AspS       | Aspartate-tRNA ligase                  | tRNA(Asp)             | Charges tRNA with aspartate                                                                         | increase                               |
| <i>thrS</i>                                                                             | increase                       | CT10844   | ThrS       | Threonine-tRNA ligase                  | tRNA(Thr)             | Charges tRNA with threonine                                                                         | increase                               |
| <i>truA</i>                                                                             | increase                       | CT10723   | TruA       | tRNA pseudouridine synthase            | tRNA-anticodon loop   | Converts uridines at 8, 3', 4' to pseudouridine                                                     |                                        |
| <i>miaA</i>                                                                             | increase                       | CT10135   | MiaA       | tRNA dimethyltransferase               | tRNA-anticodon loop   | Converts adenine (3') to N <sup>6</sup> -(dimethylallyl)adenosine                                   |                                        |
| <b>rRNA processing</b>                                                                  |                                |           |            |                                        |                       |                                                                                                     |                                        |
| <i>rnc</i>                                                                              | increase                       | CT10549   | Rnc        | Rnase III                              | 30S rRNA              | Cleaves the precursor transcript at 6S and 23S                                                      | increase                               |
| <b>Subunit assembly</b>                                                                 |                                |           |            |                                        |                       |                                                                                                     |                                        |
| <i>rpsO</i>                                                                             | decrease                       | CT10215   | S15        | ribosomal protein                      | 16S rRNA              | Assembly of 50S subunit                                                                             |                                        |
| <i>rpsT</i>                                                                             | decrease                       | CT10881   | S20        | ribosomal protein                      | 16S rRNA              | Assembly of 50S subunit                                                                             |                                        |
| <i>rpsK</i>                                                                             | decrease                       | CT10770   | S11        | ribosomal protein                      | 30S subunit           | Forms Shine-Delgarno-like left                                                                      |                                        |
| <i>rplT</i>                                                                             | decrease                       | CT10207   | L20        | ribosomal protein                      | 23S rRNA              | Assembly of 50S subunit                                                                             |                                        |
| <i>rplN</i>                                                                             | decrease                       | CT10780   | L14        | ribosomal protein                      | 23S rRNA              | Forms bridge between 80S and 50S                                                                    |                                        |
| <i>rplW</i>                                                                             | decrease                       | CT10788   | L23        | ribosomal protein                      | 23S rRNA              | Forms locking site for trigger factor                                                               | decrease                               |
| <b>Initiation</b>                                                                       |                                |           |            |                                        |                       |                                                                                                     |                                        |
| <i>infA2</i>                                                                            | decrease                       | CT10575   | IF-1       | initiation factor                      | 30S-RpsA              | Recruits 30S to RpsA                                                                                |                                        |
|                                                                                         | decrease                       |           | IF-1       | initiation factor                      | IF-3                  | IF-1 and IF-3 recruit IF-2 to 30S; IF-2 recruits mRNA and tRNA                                      |                                        |
| <i>rplN</i>                                                                             | decrease                       | CT10780   | L14        | ribosomal protein                      | 23S rRNA              | Forms bridge between 80S and 50S                                                                    | decrease                               |
| <i>rsfS</i>                                                                             | decrease                       | CT10138   | RsfS       | ribosomal releasing factor             | RplN                  | Inhibits 70S assembly                                                                               |                                        |
| <i>rplL</i>                                                                             | decrease                       | CT10568   | L7/L12     | ribosomal protein                      | GT Pases              | Binds to GPases required for IF-3 recruitment                                                       |                                        |
| <b>Elongation</b>                                                                       |                                |           |            |                                        |                       |                                                                                                     |                                        |
| <i>rplL</i>                                                                             | decrease                       | CT10568   | L7/L12     | ribosomal protein                      | GT Pases              | Binds to GPases required for EF-Tu and EF-G recruitment                                             |                                        |
| <b>Termination</b>                                                                      |                                |           |            |                                        |                       |                                                                                                     |                                        |
| <i>rpfA</i>                                                                             | decrease                       | CT10278   | RF-1       | ribosome release factor                |                       | Increases termination at UAA and UAG stop codons                                                    | decrease                               |
| <i>rplL</i>                                                                             | decrease                       | CT10568   | L7/L12     | ribosomal protein                      | GT Pases              | GTPase activity required for RF-3 recruitment                                                       |                                        |
| <b>Recycling</b>                                                                        |                                |           |            |                                        |                       |                                                                                                     |                                        |
| <i>rif</i>                                                                              | decrease                       | CT10046   | Rif        | ribosome recycling factor              |                       | Causes disassembly of stalled ribosomes                                                             |                                        |
| <i>CTL0634</i>                                                                          | increase                       | CT10634   | Hfk        | GTPase Hfk                             | 50S subunit           | Binds to E-site of 70S, disassembles ribosome                                                       |                                        |
| <b>Nascent Peptide Folding/Targeting</b>                                                |                                |           |            |                                        |                       |                                                                                                     |                                        |
| <i>fisY</i>                                                                             | decrease                       | CT10192   | FisY       | Signal recognition particle receptor   | SRP-RNC               | Targets nascent membrane proteins to Sec translocase                                                |                                        |
| <i>secY</i>                                                                             | decrease                       | CT10606   | SecY       | Protein-export membrane protein        |                       | Forms SecYEG translocation channel                                                                  |                                        |
| <i>smpB</i>                                                                             | decrease                       | CT10332   | SmpB       | SsrA-binding protein                   | tRNA                  | Guides mRNA into tRNA site, rescuing stalled ribosomes and tagging nascent peptides for degradation |                                        |
| <b>Unknown function</b>                                                                 |                                |           |            |                                        |                       |                                                                                                     |                                        |
| <i>rpmE</i>                                                                             | decrease                       | CT10277   | L31        | ribosomal protein                      | 23S rRNA              | Unknown                                                                                             |                                        |
| <i>rplQ</i>                                                                             | decrease                       | CT10768   | L15        | ribosomal protein                      | 23S rRNA              | Unknown                                                                                             |                                        |
| <i>rplY</i>                                                                             | decrease                       | CT10168   | L25        | ribosomal protein                      | 5S rRNA               | Binds to 5S in central protuberance                                                                 |                                        |

These genes were shown to be differentially regulated by EDGE RNAi in *lys* and *lcs* genomic screens. We ranked hits by  $-\log_{10}(P)$  during mid-cycle iron starvation (12+3 BPD) (5 h). Annotations and functions were retrieved from UniProt and BioCyc databases.

896

897

898 FIGURES

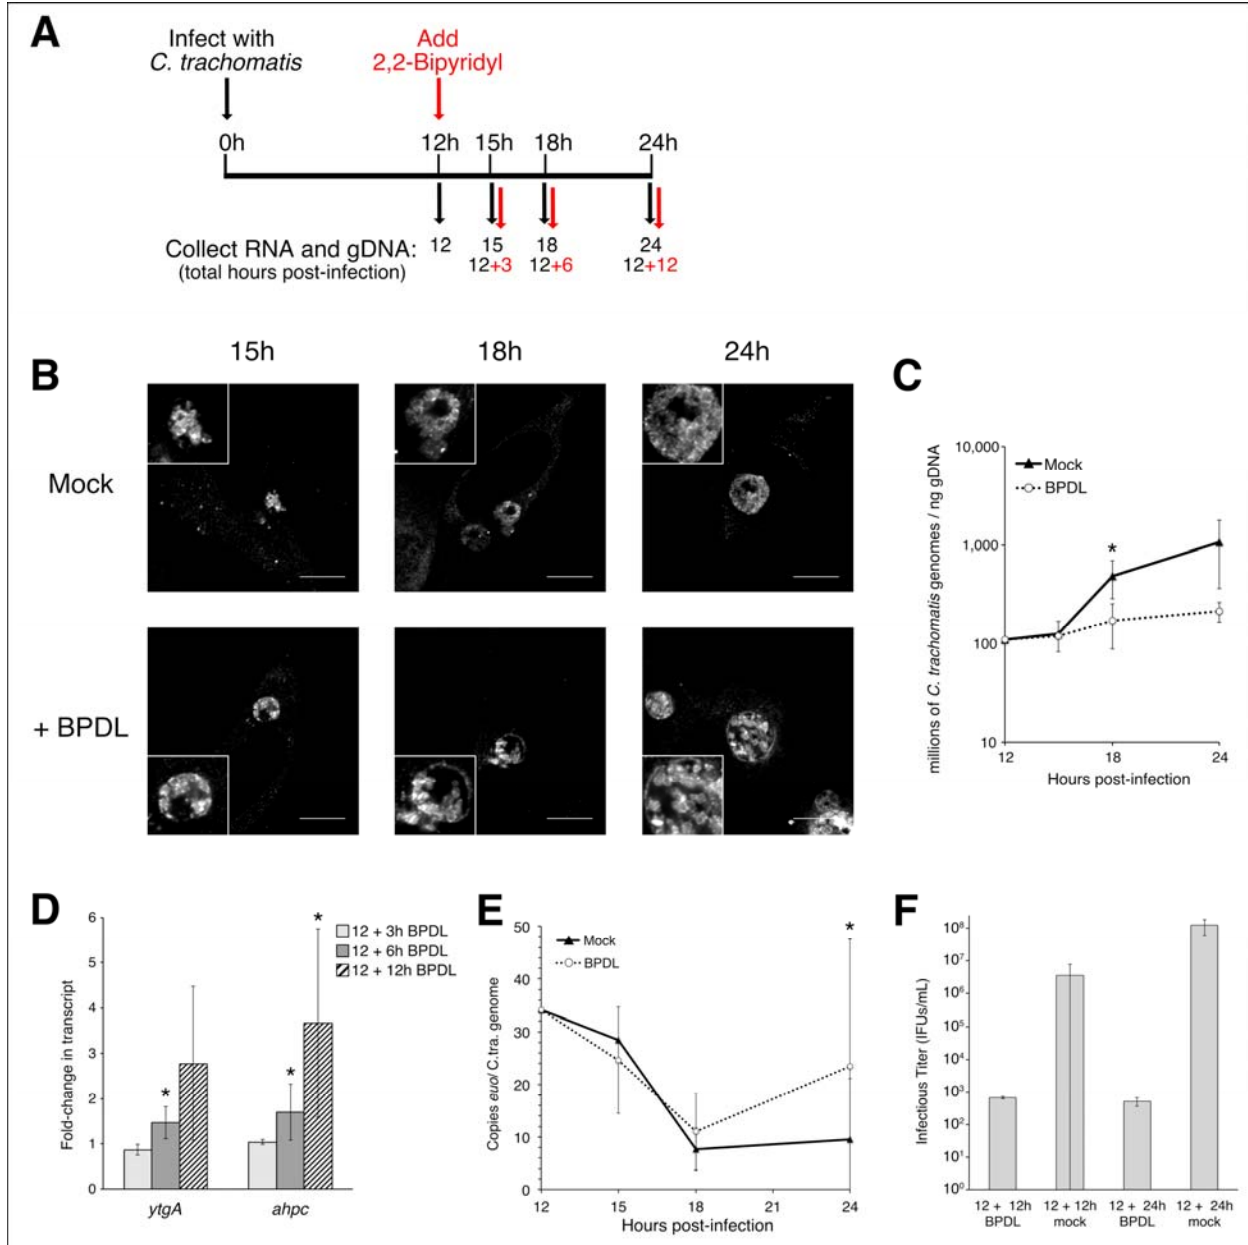

899

900 **Figure 1. Optimization of 2,2-Bipyridyl (BPD) treatment to induce iron-**  
 901 **responsiveness in the absence of persistence.** Timeline of BPD-treatment A)  
 902 starting at 12h p.i., BPD was supplemented to culture media for 3, 6, or 12h. Mock-  
 903 treated and BPD-treated samples were tested for changes to B) morphology by  
 904 confocal microscopy, C) growth by qPCR, D) iron-responsive transcription (*ytgA*, *ahpC*)

905 D), and transcription of the developmental marker, *euo*, by RT-qPCR. Significant  
906 changes with a p-value  $\leq 0.05$  in a one-tailed Student's t-test are indicated with an  
907 asterisk, and are based on 3 biological replicates for the growth curve and 4 biological  
908 replicates for RT-qPCR.

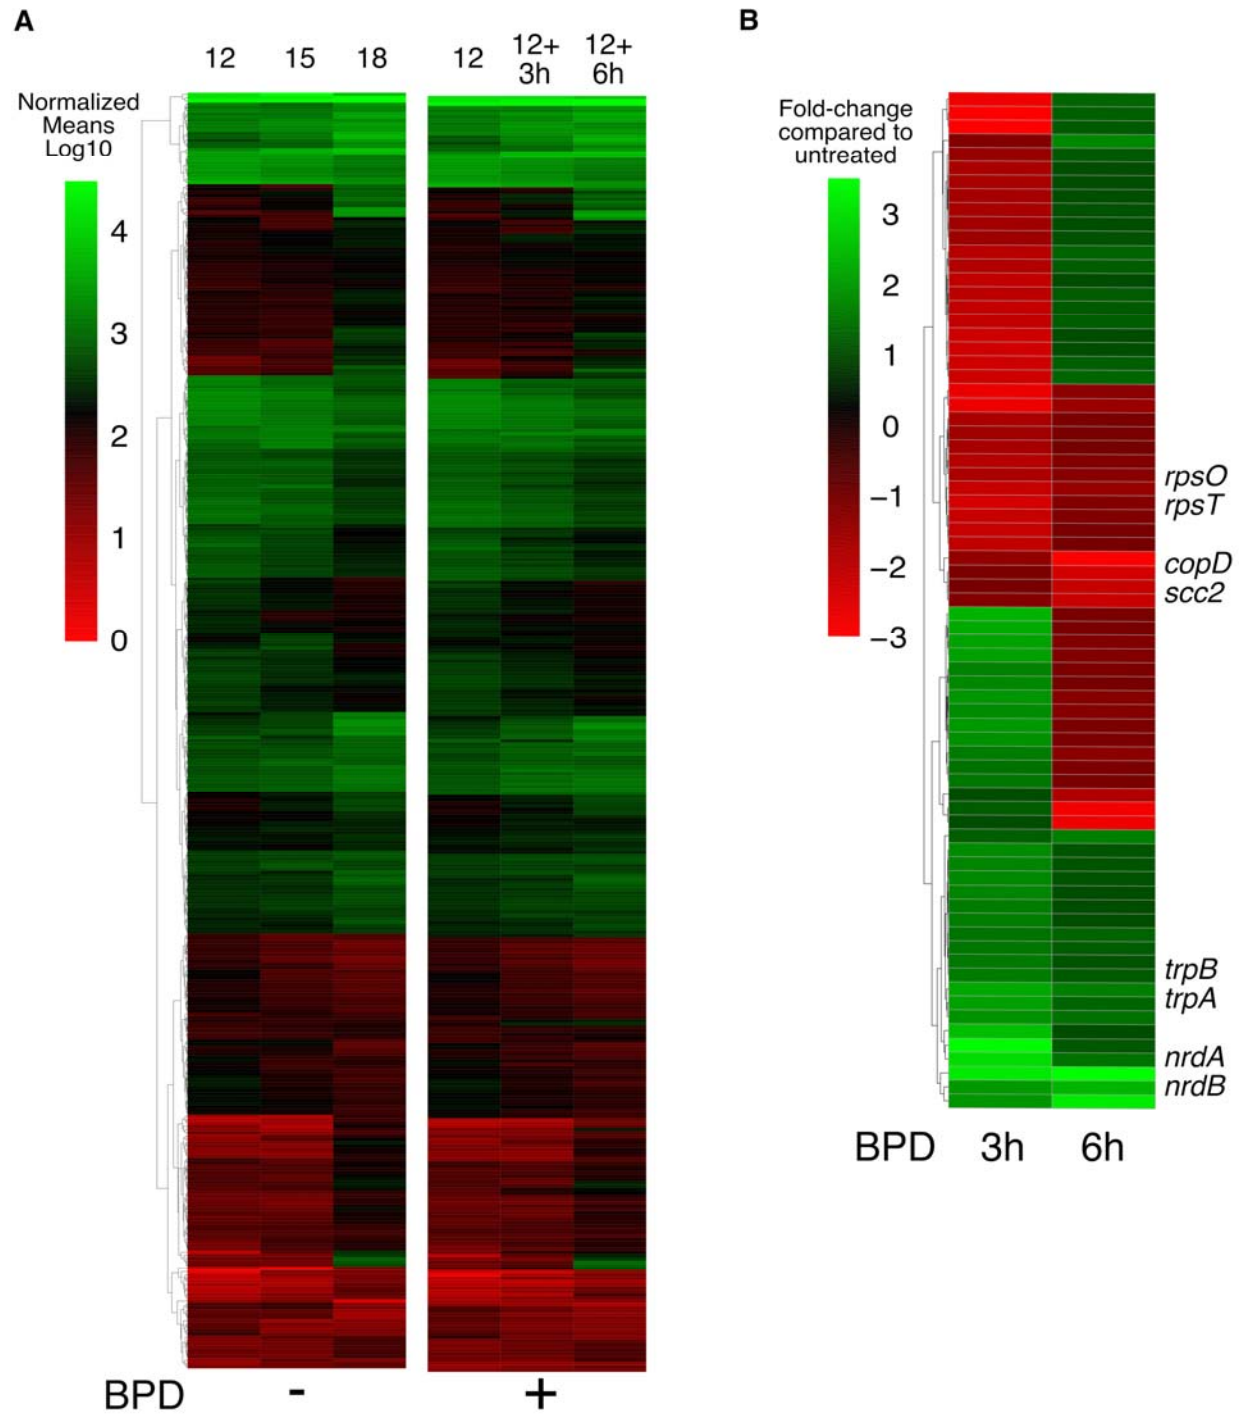

909

910 **Figure 2. Global and differential gene expression of the mid-cycle response to**  
911 **iron-starvation.** The global response of *C. trachomatis* to iron starvation was detected  
912 by RNA-sequencing and reads were aligned to the genome and plasmid. A) The  
913 untreated expression profile is displayed for all genes that change significantly (p-value



914  $\leq 0.01$ ) during mid-cycle development as a heatmap of log<sub>10</sub> transformed normalized  
915 expression means (left). Expression across the same genes are displayed for BPDL-  
916 treated samples (right). The highest and lowest expression values are displayed in  
917 green and red, respectively. B) Genes that are significantly changed in response to iron-  
918 starvation, with a p-value  $\leq 0.01$ , are displayed as a heatmap of fold-changes of BPDL-  
919 treated compared to mock-treated equivalent samples. The most highly up-regulated  
920 and down-regulated transcripts are displayed in green and red, respectively.  
921

922

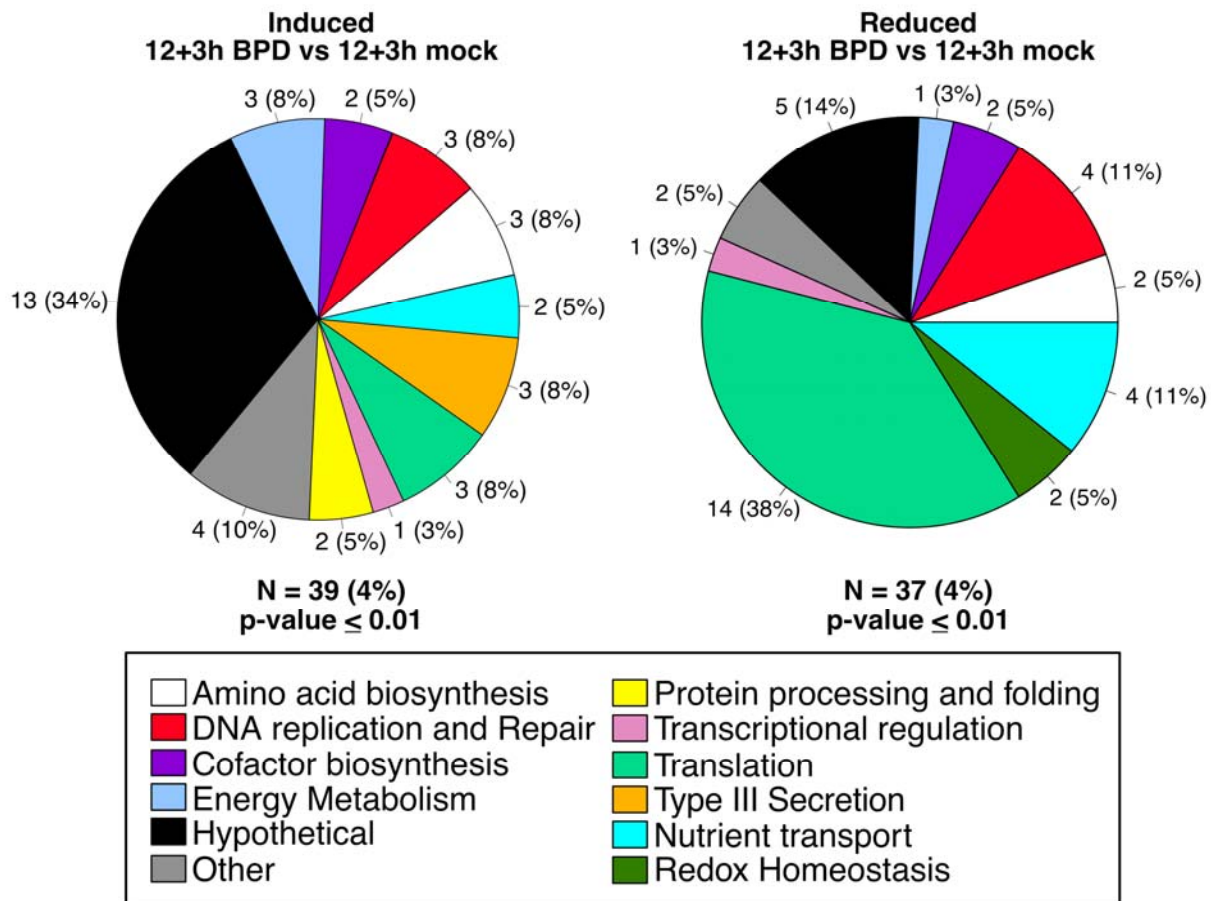

923

924 **Figure 3. Functional categorization of mid-cycle response to iron-starvation.**

925 Transcripts that were significantly up-regulated (left) or down-regulated (right) after 3h  
 926 BPD treatment, starting at 12h p.i., are organized in pie charts by their functional  
 927 categories. Adjacent to each pie slice is the number of genes in that category, and in  
 928 parenthesis is the percentage of differentially expressed genes in the category.

929 N=number of differentially expressed genes, and the percentage of the total genome  
 930 that is represented.

931

932

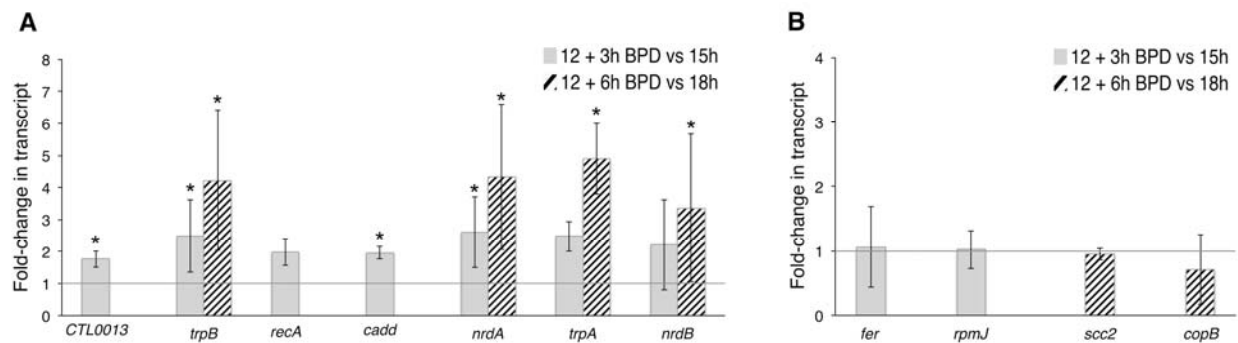

933

934 **Figure 4. Confirmation of the mid-cycle response to iron starvation by RT-qPCR.**

935 Differentially expressed transcripts detected by RNA-sequencing were confirmed by RT-  
936 qPCR. A) Up-regulated or B) down-regulated transcription is indicated as fold-changes  
937 in transcripts after 3h BPD-treatment (solid gray bar) or 6h BPD-treatment (striped bar)  
938 compared to mock-treated samples at equivalent timepoints post-infection. An asterisk  
939 indicates that the fold-change is significantly changed, with a p-value  $\leq 0.05$ . Statistical  
940 analysis was done with a one-tailed Student's t-test, based on at least 3 biological  
941 replicates.

942

943

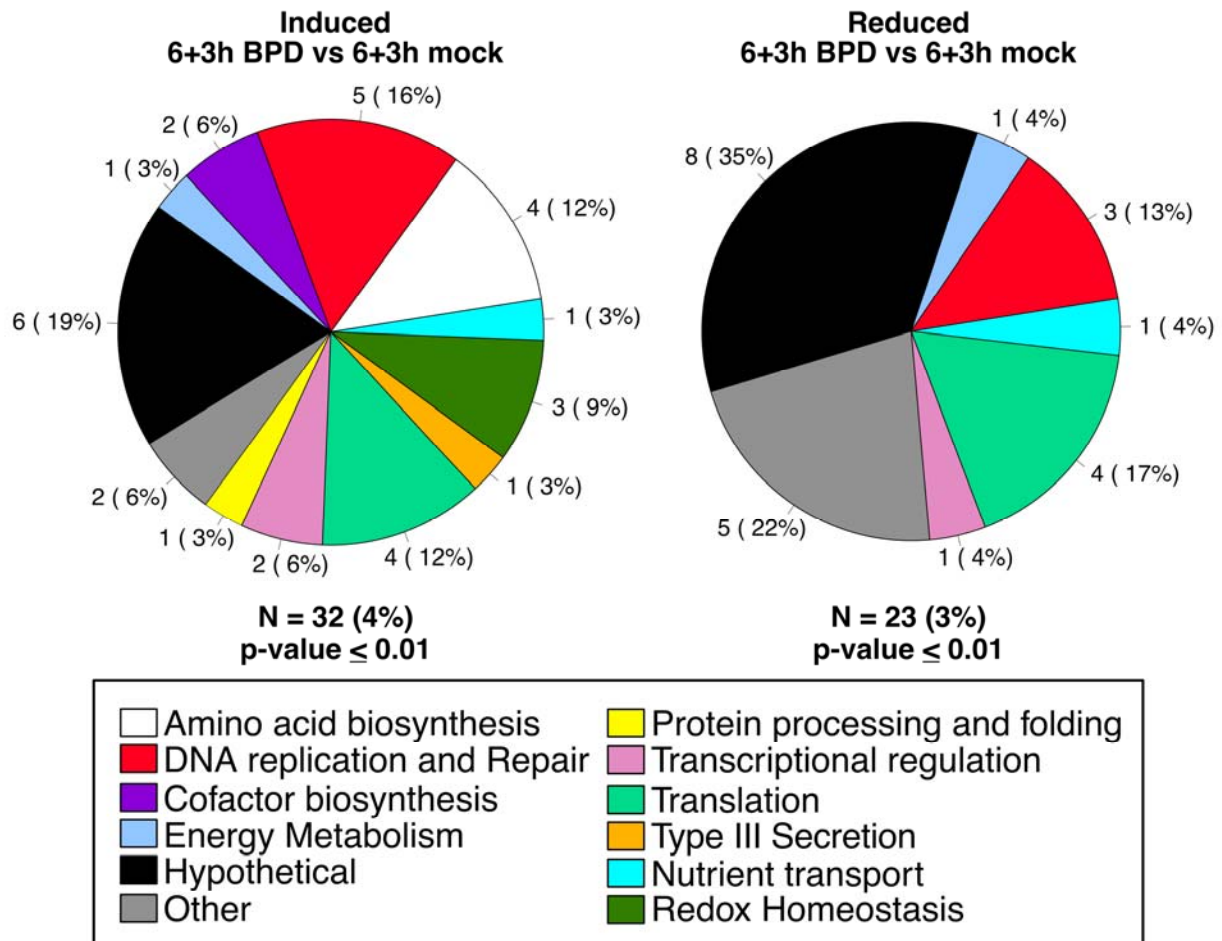

944

945 **Figure 5. Functional categorization of the early-cycle response to iron-starvation.**

946 Transcripts that were significantly up-regulated (left) or down-regulated (right) after 3h of

947 BPD treatment, starting at 6h p.i., are organized in pie charts by their functional

948 categories. Adjacent to each pie slice is the number of genes in that category, and in

949 parenthesis is the percentage of differentially expressed genes in the category that

950 make up the pie. N=number of differentially expressed genes, and the percentage of the

951 total genome represented.

952

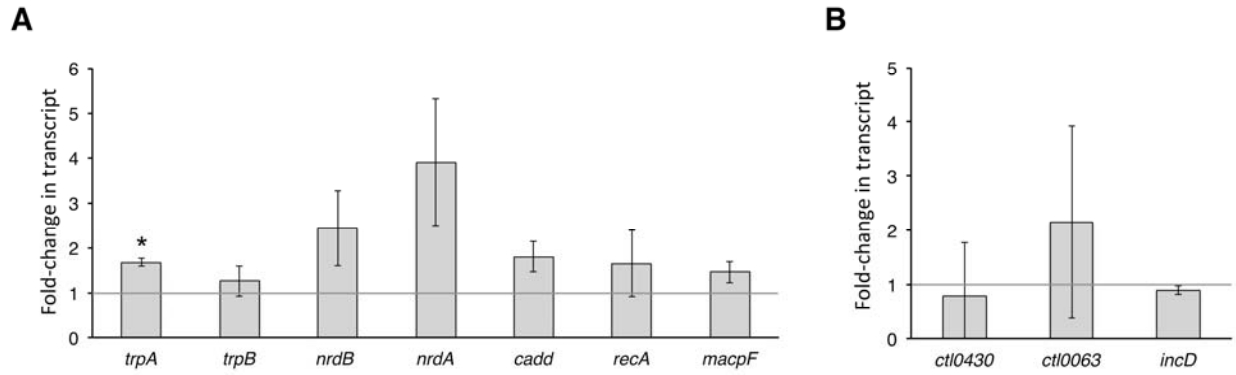

953  
954 **Figure 6. Confirmation of the early-cycle response to iron starvation by RT-qPCR.**

955 Transcripts that were significantly changed by RNA-sequencing, in response to iron-  
956 starvation starting at 6h p.i., were confirmed by RT-qPCR. A) Up-regulated or B) down-  
957 regulated transcription is indicated as fold-changes in transcripts after 3h BPD-  
958 treatment in comparison to mock-treated at equivalent timepoints post-infection (solid  
959 gray bar). An asterisk indicates that the fold-change is significantly changed, with a p-  
960 value  $\leq 0.05$ . Statistical analysis was done with a one-tailed Student's t-test, based on  
961 two biological replicates.

962

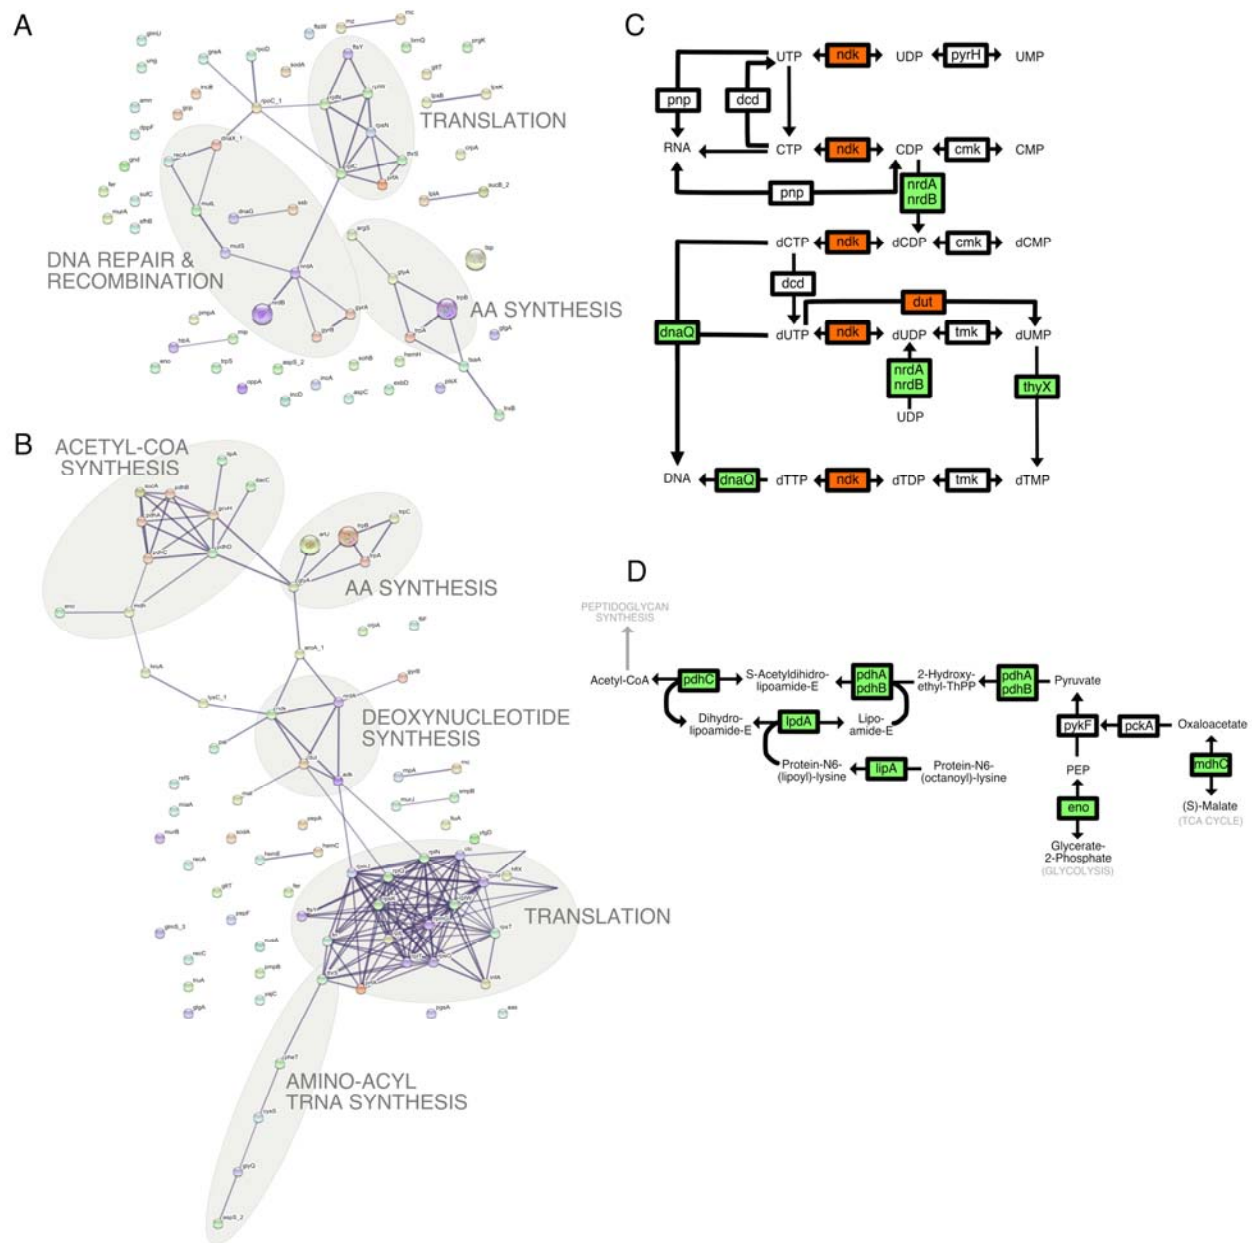

963

964 **Figure 7. Pathway analysis of iron-starvation responses.** Association networks for  
 965 differentially expressed genes, with a p-value  $\leq 0.05$ , were generated for the A) early-  
 966 cycle response (6+3h BPD) and B) mid-cycle response (12+3h BPD) using STRING-  
 967 db v.10.5. Line thickness connecting nodes (genes) correlates with confidence of gene  
 968 association, with a minimum confidence cutoff of 0.7. Mid-cycle clustered genes were  
 969 mapped to C) nucleotide metabolism and D) acetyl-CoA synthesis pathways using

970 KEGGMapper v.2.8. Up-regulated and down-regulated genes in C) and D) are shown  
971 with red and green backgrounds, respectively. Unchanged genes have a white  
972 background.

973 SUPPLEMENTARY DATA

974 **Figure S1. Annotated heatmap of BPDL-treated and mock-treated gene**

975 **expression in *C. trachomatis* that corresponds to Figure 2A.**

976 **Figure S2. Annotated heatmap of mid-cycle iron-starvation corresponding to the**

977 **subset in Figure 2B.**

978 **Table S1. Normalized means of mock-treated and BPDL-treated transcription**

979 **during mid-cycle development of *C. trachomatis*.** The mean and log<sub>10</sub> mean

980 expression values of genes that showed a significant change in gene expression during

981 normal mid-cycle development, p-value ≤ 0.01 are displayed for the following EdgeR

982 comparisons: 12h vs 18h, 12h vs 15h, 15h vs 18h) These values were used to create

983 the heatmaps in Figure 2A. Genes that had at least one value that was greater than the

984 4.5 threshold have an asterisk, and the values are displayed in bold.

985 **Table S2. Complete expression profile of *C. trachomatis* during normal**

986 **development.** The RNA-sequencing reads and EdgeR analysis of normal development

987 of *C. trachomatis* was exported from CLC Genomics Workbench 9.5.3. Samples were

988 normalized across the entire dataset by quantile scaling. rRNAs, tRNAs, and Features

989 (genes) with less than 10 reads in all samples were eliminated from the dataset prior to

990 normalization and EDGE analysis. Unique Reads are raw values. Samples were

991 merged from multiple RNA-sequencing chips to obtain a minimum of 8X coverage.

992 **Table S3. Complete expression profile of *C. trachomatis* during mid-cycle iron**

993 **starvation.**

994 The RNA-sequencing reads and EdgeR analysis of iron-starved *C. trachomatis* was

995 exported from CLC Genomics Workbench 9.5.3. Samples were normalized across the



996 entire dataset by quantile scaling. rRNAs, tRNAs, and Features (genes) with less than  
997 10 reads in all samples were eliminated from the dataset prior to normalization and  
998 EDGE analysis. Unique Reads are raw values. Samples were merged from multiple  
999 RNA-sequencing chips to obtain a minimum of 8X coverage.

1000 **Table S4. Complete expression profile of *C. trachomatis* during early-cycle iron**  
1001 **starvation.**

1002 The RNA-sequencing reads and analysis of iron-starved *C. trachomatis* was exported  
1003 from CLC Genomics Workbench 9.5.3. Samples were normalized across the entire  
1004 dataset by quantile scaling. rRNAs, tRNAs, and Features (genes) with less than 10  
1005 reads in all samples were eliminated from the dataset prior to normalization and EDGE  
1006 analysis. Unique Reads are raw values. Samples were merged from multiple RNA-  
1007 sequencing chips to obtain a minimum of 8X coverage.

1008 **Table S5. Primers used in this study.**

1009

1010
